# Supplementary material
Source: PubMed Central journal article supplement (PMC7863623)
Supplement: NIHMS1657192-supplement-Supplement1.pdf [file NIHMS1657192-supplement-Supplement1.pdf]

## Supplementary information for

### “Chemical composition, structures, and light absorption of N-containing aromatic compounds emitted from burning wood and charcoal in household cookstoves”

Mingjie Xie<sup>1</sup>, Zhenzhen Zhao<sup>1</sup>, Amara L. Holder<sup>2</sup>, Michael D. Hays<sup>2</sup>, Xi Chen<sup>2</sup>, Guofeng Shen<sup>3</sup>, James J. Jetter<sup>2</sup>, Wyatt M. Champion<sup>4</sup>, Qin’geng Wang<sup>5</sup>

<sup>1</sup>Collaborative Innovation Center of Atmospheric Environment and Equipment Technology, Jiangsu Key Laboratory of Atmospheric Environment Monitoring and Pollution Control, School of Environmental Science and Engineering, Nanjing University of Information Science & Technology, 219 Ningliu Road, Nanjing 210044, China

<sup>2</sup>Office of Research and Development, U.S. Environmental Protection Agency, 109 T.W. Alexander Drive, Research Triangle Park, NC 27711, USA

<sup>3</sup>Laboratory for Earth Surface Processes, College of Urban and Environmental Sciences, Peking University, Beijing 100871, China

<sup>4</sup>Oak Ridge Institute for Science and Education (ORISE) Postdoctoral Fellow at U.S. Environmental Protection Agency, Office of Research and Development, Air Methods and Characterization Division, 109 T.W. Alexander Drive, Research Triangle Park, NC 27711, USA

<sup>5</sup>State Key Laboratory of Pollution Control and Resource Reuse, Nanjing University, Nanjing 210023, China

*Correspondence to:* Mingjie Xie

Email: mingjie.xie@colorado.edu; mingjie.xie@nuist.edu.cn

Tel: +1-18851903788;

Fax: +86-25-58731051;

Mailing address: 219 Ningliu Road, Nanjing, Jiangsu, 210044, China

## ***S1. Cookstoves***

To improve the cookstoves for the developing world, several rounds of cookstove tests under controlled conditions were sponsored by the Partnership for Clean Indoor Air (PCIA) and United States Environmental Protection Agency (US EPA; Jetter and Kariher, 2009; MacCarty et al., 2010; Jetter et al., 2012). The fuel-specific cookstoves for red oak and charcoal burning in this work are listed in Table S1. The measurement data of modified combustion efficiency (MCE, defined as  $\text{CO}_2/(\text{CO}_2 + \text{CO})$  on a molar basis), overall thermal efficiency, and emission factors (EFs) of organic (OC) and elemental carbon (EC) for each fuel-cookstove test were provided in Xie et al. (2018). A brief description of individual cookstoves was given below, and their global deployment could be found from the Clean Cooking Catalog website (<http://catalog.cleancookstoves.org>).

**3-Stone:** the 3-stone fire is the most commonly used traditional method of cooking (Jetter and Kariher, 2009; Jetter et al., 2012). A fire is made in the center of three stones to heat the cooking pot placed above.

**EcoChula XXL** (Alpha Renewable Energy Pvt. Ltd, India): A forced-draft fan-type cookstove designed for batch-fed operation using a variety of biomass types (Shen et al., 2017). This stove is mainly deployed in India.

**Envirofit G-3300** (Envirofit International, CO, USA): A mass-produced stove initially developed by Colorado State University. The stove is constructed of high-temperature alloy steel with ceramic insulation and a cast-iron top. Removable gate and pot skirt made of cast-iron are also included. This type of cookstove is mainly deployed in Asia, North America, Southern Africa, and Australia.

**Home Stove** (BioLite LLC, NYC, USA): A low-cost, clean, and electricity generating biomass cookstove. This cookstove is designed to reduce smoke emissions and fuel consumptions, and is

mainly used in Ghana, India, and Uganda. It also generates electricity from the flame, enabling users to charge small electronics.

**Jiko Poa** (BURN Manufacturing, Kenya): A rocket stove designed for continuous-fed operation using wood. It is constructed of metal with ceramic insulation. The Jiko Poa stove is initially designed in 2010 by Burn Design Labs and manufactured in Kenya.

**CH4400** (Envirofit International, CO, USA): A dual-chamber stove designed for batch-fed operation using charcoal. An air vent is located at the based of the stove. The CH4400 stove is made of steel with cast-iron top, and is widely used in North America, Asia, Southern Africa, and Australia.

**Éclair** (GIZ, Bonn, Germany): A portable metal stove designed for batch-fed operation with charcoal. It was initially developed by Deutsch Gesellschaft für Internationale Zusammenarbeit (GIZ) to reduce charcoal consumption, cooking time, and CO emissions. The Éclair cookstove is suitable for various pot sizes and deployed in Benin.

**Jiko Koa** (BURN Manufacturing, Kenya): A typical small metal-clad ceramic charcoal stove designed for batch-fed operation. A ceramic grate for holding the charcoal fuel is considered an advantage over the common charcoal stove. This stove is manufactured in Kenya and used in many African countries (Jetter et al., 2012).

**Prakti Leo** (Prakti Design, India): A non-traditional metal charcoal stove. This stove was developed for clean and efficient burning by Prakti Desgin. The Prakti Leo stove is manufactured in India and used in Haiti and several African countries (e.g., Kenya, Sudan, and Senegal).

**Zoom Jet** (Ecozoom, OR, USA): A small metal charcoal stove with a durable, anti-rust coated cast-iron top. The Zoom Jet stove also has ceramic and high temperature thermal insulation. It was widely used and distributed in East Africa.

## ***S2. Bulk chemical and optical analysis***

A thermal-optical instrument (Sunset Laboratory, Portland, OR) running a revised NIOSH 5040 protocol (NIOSH, 1999) was used to measure the OC and EC concentrations. Bulk brown carbon (BrC) absorption of filtered (30 mm diameter,  $\times 0.2 \mu\text{m}$  pore size, PTFE filter) methanol extracts was measured using UV/Vis spectrometry. Xie et al. (2018) characterized the UV-Vis absorption properties of BrC in the methanol extracts, providing the light absorption coefficient ( $\text{Abs}_\lambda, \text{Mm}^{-1}$ ), mass absorption coefficient ( $\text{MAC}_\lambda, \text{m}^2 \text{g}^{-1}$ ), and solution absorption Ångström exponent ( $\text{Å}_{abs}$ ). Currently, the concentrations of OC and EC,  $\text{Abs}_{365}$ ,  $\text{MAC}_{365}$ , and  $\text{Å}_{abs}$  of  $Q_f$  and  $Q_b$  samples collected for red oak and charcoal burning mainly at high power water boiling test (WBT) phases are summarized in Tables S1 and S2 of the supplementary information. The light absorption of OC extracts at 365 nm has been widely used to represent BrC absorption (Chen and Bond, 2010; Hecobian et al., 2010; Liu et al., 2013).

**Table S1. Summaries of modified combustion efficiency (MCE), OC and EC concentrations and light-absorbing properties of OC in  $Q_f$  samples for each test fuel-cookstove combination.**

| Cookstove                   | Test phase | MCE <sup>a</sup><br>% | OC<br>mg m <sup>-3</sup> | EC<br>mg m <sup>-3</sup>     | EC/OC <sup>a</sup> | Extraction <sup>a</sup><br>(%) | Abs <sub>365</sub> <sup>b</sup><br>Mm <sup>-1</sup> /1000 | MAC <sub>365</sub> <sup>a</sup><br>m <sup>2</sup> gC <sup>-1</sup> | $\dot{A}_{abs}$ <sup>a</sup> |
|-----------------------------|------------|-----------------------|--------------------------|------------------------------|--------------------|--------------------------------|-----------------------------------------------------------|--------------------------------------------------------------------|------------------------------|
| <b>Red oak</b>              |            |                       |                          |                              |                    |                                |                                                           |                                                                    |                              |
| 3-Stone fire                | CS         | 95.6 ± 0.44           | 1.11 ± 0.12              | 0.98 ± 0.067                 | 0.90 ± 0.16        | 94.2 ± 0.60                    | 3.64 ± 0.40                                               | 3.48 ± 0.10                                                        | 5.88 ± 0.25                  |
|                             | SIM        | 93.7 ± 0.50           | 1.09 ± 0.33              | 0.33 ± 0.089                 | 0.36 ± 0.17        | 96.9 ± 0.56                    | 2.47 ± 1.26                                               | 2.57 ± 0.78                                                        | 5.19 ± 0.94                  |
| EcoChula XXL                | CS         | 99.5 ± 1.64           | 0.11 ± 0.017             | 0.47 ± 0.13                  | 4.39 ± 1.33        | 93.5 ± 3.02                    | 1.18 ± 0.58                                               | 11.3 ± 4.42                                                        | 3.25 ± 0.35                  |
|                             | HS         | 99.4 ± 0.08           | 0.15 ± 0.056             | 0.62 ± 0.030                 | 4.69 ± 2.17        | 71.9 ± 27.2                    | 0.83 ± 0.67                                               | 7.64 ± 3.46                                                        | 4.26 ± 0.96                  |
| Envirofit G3300             | CS         | 97.2 ± 0.68           | 0.94 ± 0.25              | 1.43 ± 0.022                 | 1.60 ± 0.43        | 87.8 ± 4.62                    | 2.72 ± 0.92                                               | 3.33 ± 0.72                                                        | 6.56 ± 0.25                  |
|                             | HS         | 95.2 ± 1.35           | 2.40 ± 1.04              | 2.73 ± 0.31                  | 1.26 ± 0.45        | 76.3 ± 3.57                    | 7.10 ± 2.85                                               | 3.93 ± 0.33                                                        | 6.74 ± 0.22                  |
| Home Stove                  | CS         | 99.3 ± 0.13           | 0.15 ± 0.026             | 0.29 ± 0.056                 | 1.96 ± 0.55        | 87.5 ± 2.14                    | 0.69 ± 0.18                                               | 5.54 ± 2.22                                                        | 3.59 ± 0.40                  |
|                             | HS         | 99.5 ± 0.06           | 0.21 ± 0.081             | 0.63 ± 0.14                  | 3.11 ± 0.50        | 92.8 ± 7.05                    | 0.57 ± 0.14                                               | 3.00 ± 0.55                                                        | 3.43 ± 0.018                 |
| Jiko Poa                    | CS         | 97.7 ± 0.35           | 0.57 ± 0.028             | 0.70 ± 0.16                  | 1.23 ± 0.32        | 96.7 ± 0.65                    | 2.30 ± 0.32                                               | 4.15 ± 0.60                                                        | 4.61 ± 0.20                  |
|                             | HS         | 97.7 ± 0.40           | 0.78 ± 0.066             | 1.25 ± 0.25                  | 1.63 ± 0.43        | 92.3 ± 1.70                    | 2.51 ± 0.41                                               | 3.67 ± 0.72                                                        | 5.01 ± 0.49                  |
| Jiko Poa (HM <sup>c</sup> ) | CS         | 97.4 ± 0.25           | 0.86 ± 0.16              | 0.32 ± 0.11                  | 0.37 ± 0.084       | 95.4 ± 1.32                    | 2.24 ± 0.56                                               | 2.72 ± 0.29                                                        | 5.06 ± 0.56                  |
|                             | HS         | 97.5 ± 0.19           | 0.82 ± 0.16              | 0.55 ± 0.20                  | 0.71 ± 0.34        | 95.9 ± 0.85                    | 3.28 ± 0.45                                               | 4.18 ± 0.35                                                        | 3.99 ± 0.12                  |
| <b>Charcoal</b>             |            |                       |                          |                              |                    |                                |                                                           |                                                                    |                              |
| CH4400                      | CS         | 97.3 ± 0.06           | 0.048 ± 0.020            | 0.39 ± 0.082                 | 8.73 ± 2.66        | 97.8 ± 3.02                    | 0.12 ± 0.046                                              | 2.96 ± 1.73                                                        | 3.79 ± 0.64                  |
|                             | HS         | 95.2 ± 0.78           | 0.072 ± 0.042            | 0.0030 ± 0.0010 <sup>d</sup> | 0.020 ± 0.019      | 96.3 ± 5.44                    | 0.14 ± 0.099                                              | 1.96 ± 0.39                                                        | 7.91 ± 1.55                  |
| Éclair                      | CS         | 90.3 ± 0.54           | 0.19 ± 0.068             | 0.68 ± 0.25                  | 3.67 ± 0.11        | 95.3 ± 6.18                    | 0.18 ± 0.12                                               | 0.93 ± 0.33                                                        | 6.64 ± 2.20                  |
|                             | HS         | 88.9 ± 0.93           | 0.47 ± 0.022             | 0.020 ± 0.0044               | 0.042 ± 0.0094     | 96.6 ± 1.58                    | 0.72 ± 0.072                                              | 1.57 ± 0.18                                                        | 6.93 ± 0.15                  |
| Jiko Koa                    | CS         | 92.0 ± 1.44           | 0.14 ± 0.095             | 0.50 ± 0.29                  | 4.69 ± 3.16        | 95.3 ± 2.24                    | 0.35 ± 0.36                                               | 2.31 ± 1.20                                                        | 4.16 ± 0.79                  |
|                             | HS         | 82.0 ± 2.14           | 0.63 ± 0.31              | 0.017 ± 0.0074               | 0.028 ± 0.0039     | 97.0 ± 0.79                    | 1.03 ± 0.42                                               | 1.82 ± 0.44                                                        | 7.21 ± 0.45                  |
| Prakti Leo                  | CS         | 92.0 ± 1.08           | 0.13 ± 0.063             | 0.72 ± 0.42                  | 5.64 ± 0.60        | 97.9 ± 2.44                    | 0.29 ± 0.16                                               | 2.30 ± 0.78                                                        | 4.53 ± 0.99                  |
|                             | HS         | 87.9 ± 1.02           | 0.50 ± 0.092             | 0.010 ± 0.0020               | 0.021 ± 0.0038     | 98.3 ± 0.58                    | 0.80 ± 0.24                                               | 1.60 ± 0.31                                                        | 8.90 ± 0.63                  |
| Zoom Jet                    | CS         | 93.3 ± 1.00           | 0.073 ± 0.013            | 0.60 ± 0.33                  | 7.89 ± 2.91        | 91.7 ± 7.07                    | 0.19 ± 0.11                                               | 2.65 ± 0.87                                                        | 3.88 ± 1.12                  |
|                             | HS         | 93.4 ± 1.05           | 0.56 ± 0.35              | 0.021 ± 0.014                | 0.036 ± 0.0061     | 95.5 ± 0.61                    | 0.87 ± 0.47                                               | 1.77 ± 0.39                                                        | 7.64 ± 0.62                  |

<sup>a</sup> Data were obtained from Xie et al. (2018); <sup>b</sup> values presented here have been divided by 1000; <sup>c</sup> high moisture; <sup>d</sup> measurements of only two filter samples were available, the values reported here are average ± difference between the two measurements/2

**Table S2. Summaries of OC concentrations and light-absorbing properties of OC in  $Q_b$  samples for each test fuel-cookstove combination.**

| Cookstove       | Test phase | OC<br>mg m <sup>-3</sup> | $Q_b$ OC/ $Q_f$ OC <sup>a</sup><br>% | Abs365 <sup>b</sup><br>Mm <sup>-1</sup> /1000 | MAC <sub>365</sub> <sup>a</sup><br>m <sup>2</sup> gC <sup>-1</sup> | Åabs <sup>a</sup> | Temp. <sup>c</sup><br>°C |
|-----------------|------------|--------------------------|--------------------------------------|-----------------------------------------------|--------------------------------------------------------------------|-------------------|--------------------------|
| <b>Red oak</b>  |            |                          |                                      |                                               |                                                                    |                   |                          |
| 3-Stone fire    | CS         | 0.13 ± 0.0091            | 11.9 ± 0.59                          | 0.24 ± 0.0052                                 | 1.83 ± 0.12                                                        | 6.86 ± 0.41       | 24.6 ± 0.57              |
|                 | SIM        | 0.16 ± 0.066             | 16.2 ± 4.54                          | 0.23 ± 0.055                                  | 1.50 ± 0.26                                                        | 8.34 ± 1.26       | 24.2 ± 0.57              |
| EcoChula XXL    | CS         | 0.022 ± 0.0024           | 20.2 ± 0.96                          | 0.064 ± 0.026                                 | 2.86 ± 0.94                                                        | 3.78 ± 0.14       | 44.1 ± 1.81              |
|                 | HS         | 0.027 ± 0.0070           | 20.1 ± 8.49                          | 0.081 ± 0.0063                                | 3.11 ± 0.81                                                        | 3.53 ± 1.30       | 48.3 ± 1.52              |
| Envirofit G3300 | CS         | 0.095 ± 0.023            | 10.3 ± 1.93                          | 0.17 ± 0.031                                  | 1.84 ± 0.33                                                        | 8.58 ± 2.39       | 22.4 ± 0.61              |
|                 | HS         | 0.15 ± 0.34              | 6.79 ± 1.56                          | 0.31 ± 0.049                                  | 2.08 ± 0.46                                                        | 6.40 ± 1.62       | 23.2 ± 0.49              |
| Home Stove      | CS         | 0.028 ± 0.0033           | 19.1 ± 1.55                          | 0.046 ± 0.015                                 | 1.69 ± 0.62                                                        | 5.59 ± 0.80       | 22.9 ± 0.62              |
|                 | HS         | 0.039 ± 0.0009           | 20.5 ± 7.59                          | 0.042 ± 0.014                                 | 1.05 ± 0.33                                                        | 6.27 ± 2.39       | 24.1 ± 0.84              |
| Jiko Poa        | CS         | 0.081 ± 0.0065           | 14.0 ± 0.61                          | 0.18 ± 0.013                                  | 2.23 ± 0.063                                                       | 6.20 ± 0.36       | 23.7 ± 0.08              |
|                 | HS         | 0.11 ± 0.016             | 14.2 ± 1.72                          | 0.19 ± 0.061                                  | 1.83 ± 0.021                                                       | 6.94 ± 0.19       | 24.8 ± 0.35              |
| Jiko Poa (HM)   | CS         | 0.11 ± 0.012             | 13.2 ± 1.06                          | 0.15 ± 0.012                                  | 1.31 ± 0.084                                                       | 8.23 ± 0.77       | 23.1 ± 0.16              |
|                 | HS         | 0.11 ± 0.018             | 14.0 ± 0.55                          | 0.16 ± 0.015                                  | 1.38 ± 0.21                                                        | 7.74 ± 0.37       | 24.1 ± 0.05              |
| <b>Charcoal</b> |            |                          |                                      |                                               |                                                                    |                   |                          |
| CH4400          | CS         | 0.020 ± 0.015            | 30.0 ± 21.7                          | 0.017 ± 0.0085 <sup>d</sup>                   | 1.36 ± 0.60                                                        | 6.32 ± 0.18       | 23.3 ± 0.22              |
|                 | HS         | 0.041 ± 0.015            | 66.0 ± 26.4                          | 0.029 ± 0.026                                 | 0.66 ± 0.55                                                        | 10.5 ± 5.99       | 23.6 ± 0.27              |
| Éclair          | CS         | 0.059 ± 0.017            | 32.7 ± 4.66                          | 0.031 ± 0.028                                 | 0.47 ± 0.31                                                        | 8.44 ± 3.13       | 23.6 ± 0.51              |
|                 | HS         | 0.13 ± 0.0077            | 27.7 ± 1.72                          | 0.11 ± 0.012                                  | 0.83 ± 0.10                                                        | 8.19 ± 2.63       | 23.8 ± 0.51              |
| Jiko Koa        | CS         | 0.058 ± 0.031            | 42.5 ± 7.12                          | 0.057 ± 0.044                                 | 0.72 ± 0.26                                                        | 11.8 ± 8.53       | 22.0 ± 0.53              |
|                 | HS         | 0.21 ± 0.070             | 38.0 ± 12.8                          | 0.17 ± 0.027                                  | 0.88 ± 0.47                                                        | 10.5 ± 2.82       | 22.2 ± 0.84              |
| Prakti Leo      | CS         | 0.043 ± 0.010            | 37.5 ± 9.20                          | 0.028 ± 0.012                                 | 0.65 ± 0.21                                                        | 9.51 ± 3.13       | 22.6 ± 1.13              |
|                 | HS         | 0.15 ± 0.027             | 30.7 ± 9.98                          | 0.12 ± 0.016                                  | 0.81 ± 0.043                                                       | 8.48 ± 1.03       | 23.2 ± 0.89              |
| Zoom Jet        | CS         | 0.023 ± 0.0076           | 32.5 ± 14.2                          | 0.016 ± 0.014                                 | 0.96 ± 1.08                                                        | 7.72 ± 2.23       | 22.7 ± 0.52              |
|                 | HS         | 0.16 ± 0.077             | 31.6 ± 8.82                          | 0.10 ± 0.077                                  | 0.57 ± 0.27                                                        | 12.3 ± 3.04       | 23.0 ± 0.56              |

<sup>a</sup> Data were obtained from Xie et al. (2018); <sup>b</sup> values presented here have been divided by 1000; <sup>c</sup> sampling temperature; <sup>d</sup> measurements of only two filter samples were available, the values reported here are average ± difference between the two measurements/2

**Table S3. Identified N-containing aromatic compounds by HPLC/ESI-Q-ToFMS from solid fuel combustions in cookstoves.**

| Suggested Formula                                                  | Theoretical m/z [M-H] <sup>-</sup> | Measured m/z [M-H] <sup>-</sup> | Proposed structure                                                                  | Quantified as <sup>b</sup>                                                                                                                                             | Absorbing as <sup>c</sup>                                                                                                                                            |
|--------------------------------------------------------------------|------------------------------------|---------------------------------|-------------------------------------------------------------------------------------|------------------------------------------------------------------------------------------------------------------------------------------------------------------------|----------------------------------------------------------------------------------------------------------------------------------------------------------------------|
| C <sub>6</sub> H <sub>5</sub> NO <sub>3</sub>                      | 138.0196                           | 138.0194                        | 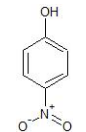   | <br>4-Nitrophenol (C <sub>6</sub> H <sub>5</sub> NO <sub>3</sub> )                  | <br>4-Nitrophenol (C <sub>6</sub> H <sub>5</sub> NO <sub>3</sub> )                |
| C <sub>7</sub> H <sub>7</sub> NO <sub>3</sub> (Iso1 <sup>a</sup> ) | 152.0353                           | 152.0356                        |    | <br>2-Methyl-4-nitrophenol (C <sub>7</sub> H <sub>7</sub> NO <sub>3</sub> )         | <br>2-Methyl-4-nitrophenol (C <sub>7</sub> H <sub>7</sub> NO <sub>3</sub> )       |
| C <sub>7</sub> H <sub>7</sub> NO <sub>3</sub> (Iso2)               | 152.0353                           | 152.0361                        |    | <br>2-Methyl-4-nitrophenol (C <sub>7</sub> H <sub>7</sub> NO <sub>3</sub> )         | <br>2-Methyl-4-nitrophenol (C <sub>7</sub> H <sub>7</sub> NO <sub>3</sub> )       |
| C <sub>6</sub> H <sub>5</sub> NO <sub>4</sub>                      | 154.0145                           | 154.0146                        |    | <br>4-Nitrocatechol (C <sub>6</sub> H <sub>5</sub> NO <sub>4</sub> )                | <br>4-Nitrocatechol (C <sub>6</sub> H <sub>5</sub> NO <sub>4</sub> )              |
| C <sub>7</sub> H <sub>7</sub> NO <sub>4</sub> (Iso1 <sup>a</sup> ) | 168.0302                           | 168.0304                        |   | <br>2-Methyl-4-nitroresorcinol (C <sub>7</sub> H <sub>7</sub> NO <sub>4</sub> )    | <br>2-Methyl-4-nitroresorcinol (C <sub>7</sub> H <sub>7</sub> NO <sub>4</sub> )  |
| C <sub>7</sub> H <sub>7</sub> NO <sub>4</sub> (Iso2)               | 168.0302                           | 168.0302                        |  | <br>2-Methyl-4-nitroresorcinol (C <sub>7</sub> H <sub>7</sub> NO <sub>4</sub> )   | <br>2-Methyl-4-nitroresorcinol (C <sub>7</sub> H <sub>7</sub> NO <sub>4</sub> ) |
| C <sub>8</sub> H <sub>7</sub> NO <sub>4</sub> (Iso1)               | 180.0302                           | 180.0304                        |  | <br>2-Methyl-5-nitrobenzoic acid (C <sub>8</sub> H <sub>7</sub> NO <sub>4</sub> ) | <br>phenyl cyanate (C <sub>7</sub> H <sub>5</sub> NO)                           |

<sup>a</sup> Isomer 1; <sup>b</sup> standard compounds used for the quantification of identified N-containing aromatic compounds; <sup>c</sup> standard compounds used to estimate the light absorption of N-containing aromatic compounds.

**Table S3. Continue.**

| Suggested Formula                                    | Theoretical m/z [M-H] <sup>-</sup> | Measured m/z [M-H] <sup>-</sup> | Proposed structure                                                                  | Quantified as                                                                                                                                                              | Absorbing as                                                                                                                                                         |
|------------------------------------------------------|------------------------------------|---------------------------------|-------------------------------------------------------------------------------------|----------------------------------------------------------------------------------------------------------------------------------------------------------------------------|----------------------------------------------------------------------------------------------------------------------------------------------------------------------|
| C <sub>8</sub> H <sub>7</sub> NO <sub>4</sub> (Iso2) | 180.0302                           | 180.0303                        | 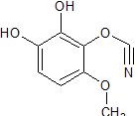   | <br>2-Methyl-5-nitrobenzoic acid (C <sub>8</sub> H <sub>7</sub> NO <sub>4</sub> )       | <br>phenyl cyanate (C <sub>7</sub> H <sub>5</sub> NO)                             |
| C <sub>8</sub> H <sub>9</sub> NO <sub>4</sub>        | 182.0459                           | 182.0460                        |    | <br>2-Methyl-4-nitroresorcinol (C <sub>7</sub> H <sub>7</sub> NO <sub>4</sub> )         | <br>2-Methyl-4-nitroresorcinol (C <sub>7</sub> H <sub>7</sub> NO <sub>4</sub> )   |
| C <sub>8</sub> H <sub>5</sub> NO <sub>2</sub>        | 146.0248                           | 146.0248                        |    | <br>4-cyanobenzoic acid (C <sub>8</sub> H <sub>5</sub> NO <sub>2</sub> )                | <br>4-cyanobenzoic acid (C <sub>8</sub> H <sub>5</sub> NO <sub>2</sub> )          |
| C <sub>7</sub> H <sub>7</sub> NO <sub>5</sub>        | 184.0253                           | 184.0258                        |    | <br>2-Nitrophenol (C <sub>6</sub> H <sub>5</sub> NO <sub>2</sub> )                      | <br>2-Nitrophenol (C <sub>6</sub> H <sub>5</sub> NO <sub>2</sub> )                |
| C <sub>10</sub> H <sub>7</sub> NO <sub>3</sub>       | 188.0353                           | 188.0357                        |    | <br>2-Nitro-1-naphthol (C <sub>10</sub> H <sub>7</sub> NO <sub>3</sub> )                | <br>2-Nitro-1-naphthol (C <sub>10</sub> H <sub>7</sub> NO <sub>3</sub> )          |
| C <sub>9</sub> H <sub>9</sub> NO <sub>4</sub> (Iso1) | 194.0458                           | 194.0464                        |  | <br>2,5-Dimethyl-4-nitrobenzoic acid (C <sub>9</sub> H <sub>9</sub> NO <sub>4</sub> )  | <br>phenyl cyanate (C <sub>7</sub> H <sub>5</sub> NO)                           |
| C <sub>9</sub> H <sub>9</sub> NO <sub>4</sub> (Iso2) | 194.0458                           | 194.0464                        |  | <br>2,5-Dimethyl-4-nitrobenzoic acid (C <sub>9</sub> H <sub>9</sub> NO <sub>4</sub> ) | <br>2-Methyl-4-nitroresorcinol (C <sub>7</sub> H <sub>7</sub> NO <sub>4</sub> ) |



**Table S3. Continue.**

| Suggested Formula                               | Theoretical m/z [M-H] <sup>-</sup> | Measured m/z [M-H] <sup>-</sup> | Proposed structure | Quantified as                                                                 | Absorbing as                                                                |
|-------------------------------------------------|------------------------------------|---------------------------------|--------------------|-------------------------------------------------------------------------------|-----------------------------------------------------------------------------|
| C <sub>8</sub> H <sub>7</sub> NO <sub>5</sub>   | 196.0251                           | 196.0252                        |                    | 2-Methyl-5-nitrobenzoic acid (C <sub>8</sub> H <sub>7</sub> NO <sub>4</sub> ) | 2-Methyl-4-nitroresorcinol (C <sub>7</sub> H <sub>7</sub> NO <sub>4</sub> ) |
| C <sub>8</sub> H <sub>9</sub> NO <sub>5</sub>   | 198.0407                           | 198.0413                        |                    | 2-Nitrophenol (C <sub>6</sub> H <sub>5</sub> NO <sub>3</sub> )                | 2-Nitrophenol (C <sub>6</sub> H <sub>5</sub> NO <sub>3</sub> )              |
| C <sub>11</sub> H <sub>9</sub> NO <sub>3</sub>  | 202.0510                           | 202.0492                        |                    | 2-Nitro-1-naphthol (C <sub>10</sub> H <sub>7</sub> NO <sub>3</sub> )          | 2-Nitro-1-naphthol (C <sub>10</sub> H <sub>7</sub> NO <sub>3</sub> )        |
| C <sub>10</sub> H <sub>11</sub> NO <sub>4</sub> | 208.0615                           | 208.0621                        |                    | 2-Nitrophenol (C <sub>6</sub> H <sub>5</sub> NO <sub>3</sub> )                | phenyl cyanate (C <sub>7</sub> H <sub>5</sub> NO)                           |
| C <sub>10</sub> H <sub>11</sub> NO <sub>5</sub> | 224.0564                           | 224.0592                        |                    | 2-Nitrophenol (C <sub>6</sub> H <sub>5</sub> NO <sub>3</sub> )                | 2-Nitrophenol (C <sub>6</sub> H <sub>5</sub> NO <sub>3</sub> )              |
| C <sub>11</sub> H <sub>13</sub> NO <sub>5</sub> | 238.0721                           | 238.0722                        |                    | 2-Nitrophenol (C <sub>6</sub> H <sub>5</sub> NO <sub>3</sub> )                | phenyl cyanate (C <sub>7</sub> H <sub>5</sub> NO)                           |
| C <sub>11</sub> H <sub>13</sub> NO <sub>6</sub> | 254.0670                           | 254.0670                        |                    | 2-Nitrophenol (C <sub>6</sub> H <sub>5</sub> NO <sub>3</sub> )                | phenyl cyanate (C <sub>7</sub> H <sub>5</sub> NO)                           |

**Table S4. MAC<sub>365, iNAC</sub> (m<sup>2</sup> g<sup>-1</sup>) values for identified NAC formulas.**

| Formula   | MW (M-H) <sup>-</sup> | MAC <sub>365, iNAC</sub> <sup>a</sup> |
|-----------|-----------------------|---------------------------------------|
| C6H5NO3   | 138.0197              | 2.44                                  |
| C7H7NO3   | 152.0353              | 3.15                                  |
| C6H5NO4   | 154.0146              | 7.02                                  |
| C7H7NO4   | 168.0302              | 12.9                                  |
| C8H7NO4   | 180.0302              | 0                                     |
| C8H9NO4   | 182.0459              | 12.9                                  |
| C8H5NO2   | 146.0248              | 0 <sup>b</sup>                        |
| C7H7NO5   | 184.0251              | 14.0                                  |
| C10H7NO3  | 188.0353              | 3.75                                  |
| C9H9NO4   | 194.0459              | 12.9 <sup>c</sup>                     |
| C8H7NO5   | 196.0251              | 12.9                                  |
| C8H9NO5   | 198.0407              | 14.0                                  |
| C11H9NO3  | 202.051               | 3.75                                  |
| C10H11NO4 | 208.0615              | 0                                     |
| C10H11NO5 | 224.0564              | 14.0                                  |
| C11H13NO5 | 238.0721              | 0                                     |
| C11H13NO6 | 254.067               | 0                                     |

<sup>a</sup> Obtained from Xie et al. (2017, 2019); <sup>c</sup> obtained in this study, and no light absorption was observed for 4-cyanobenzoic acid at > 350 nm; <sup>c</sup> value for the second isomer, and the MAC<sub>365, iNAC</sub> of the first isomer is set at 0 based on its structure.

**Table S5. Average emission factors of total NACs and OC**

| Fuel & Test phase                        | Red Oak     |                 | Charcoal        |             |
|------------------------------------------|-------------|-----------------|-----------------|-------------|
|                                          | CS          | HS <sup>a</sup> | CS              | HS          |
| <b>Front filter (Q<sub>f</sub>)</b>      |             |                 |                 |             |
| Sample number                            | 18          | 17 <sup>b</sup> | 15              | 15          |
| total NAC (mg kg <sup>-1</sup> dry fuel) | 1.18 ± 0.58 | 1.23 ± 0.69     | 0.79 ± 0.65     | 1.40 ± 0.65 |
| OC (mg kg <sup>-1</sup> dry fuel)        | 244 ± 170   | 340 ± 326       | 179 ± 114       | 619 ± 368   |
| <b>Backup filter (Q<sub>b</sub>)</b>     |             |                 |                 |             |
| Sample number                            | 18          | 17 <sup>b</sup> | 14 <sup>b</sup> | 15          |
| total NAC (mg kg <sup>-1</sup> dry fuel) | 0.55 ± 0.24 | 0.61 ± 0.38     | 0.62 ± 0.53     | 1.83 ± 0.79 |
| OC (mg kg <sup>-1</sup> dry fuel)        | 30.5 ± 17.6 | 38.2 ± 24.8     | 66.5 ± 38.9     | 196 ± 96.2  |

<sup>a</sup> Including three SIM phase samples from the 3-stone fire; <sup>b</sup> one filter sample was missed for analysis.

**Table S6. Average mass ratios (%) of individual NACs to OC (iNACoc%) in  $Q_f$  samples for burning red oak in different household cookstoves.**

| Compound                    | 3-Stone fire        |                             | EcoChula XXL                 |                              | Envirofit G3300              |                              |
|-----------------------------|---------------------|-----------------------------|------------------------------|------------------------------|------------------------------|------------------------------|
|                             | CS                  | SIM                         | CS                           | HS                           | CS                           | HS                           |
| C6H5NO3                     | 0.0054 ± 0.0009     | 0.0026 ± 0.0014             | 0.33 ± 0.069                 | 0.33 ± 0.10                  | 0.0015 ± 0.0012 <sup>b</sup> | 0.0018 ± 0.0015 <sup>b</sup> |
| C7H7NO3                     | 0.0008 <sup>a</sup> | /                           | 0.028 ± 0.0068               | 0.029 ± 0.010                | 0.0032 <sup>a</sup>          | /                            |
| C6H5NO4                     | 0.040 ± 0.11        | 0.053 ± 0.057               | 0.082 ± 0.036                | 0.092 ± 0.050                | 0.024 ± 0.0062               | 0.021 ± 0.0052               |
| C7H7NO4                     | 0.018 ± 0.0075      | 0.020 ± 0.021               | 0.010 ± 0.0066               | 0.011 ± 0.010                | 0.0088 ± 0.0018              | 0.0097 ± 0.0069              |
| C8H7NO4                     | 0.034 ± 0.018       | 0.021 ± 0.0095 <sup>b</sup> | 0.021 ± 0.0030               | 0.021 ± 0.012                | 0.028 ± 0.0051               | 0.014 ± 0.0052               |
| C8H9NO4                     | 0.012 ± 0.0046      | 0.012 ± 0.0066              | 0.0030 ± 0.0013              | 0.0045 ± 0.0020              | 0.0038 ± 0.0017              | 0.0035 ± 0.0052              |
| C8H5NO2                     | /                   | /                           | /                            | /                            | /                            | /                            |
| C7H7NO5                     | 0.0014 ± 0.0006     | 0.0048 ± 0.0050             | /                            | /                            | /                            | /                            |
| C10H7NO3                    | 0.11 ± 0.026        | 0.037 ± 0.031               | 2.16 ± 0.35                  | 2.04 ± 0.55                  | 0.15 ± 0.068                 | 0.087 ± 0.041                |
| C9H9NO4                     | 0.031 ± 0.012       | 0.020 ± 0.010               | 0.071 ± 0.035                | 0.051 ± 0.021                | 0.046 ± 0.013                | 0.015 ± 0.0052               |
| C8H7NO5                     | 0.0051 <sup>a</sup> | /                           | 0.026 ± 0.0047               | 0.029 ± 0.018                | 0.058 ± 0.026                | 0.016 ± 0.010                |
| C8H9NO5                     | 0.0094 ± 0.0053     | 0.012 ± 0.0095              | 0.071 ± 0.016                | 0.080 ± 0.050                | 0.011 ± 0.0040               | 0.0046 ± 0.0017              |
| C11H9NO3                    | 0.10 ± 0.057        | 0.034 <sup>a</sup>          | 0.42 ± 0.10                  | 0.38 ± 0.082                 | 0.056 ± 0.019                | 0.044 ± 0.018                |
| C10H11NO4                   | 0.0069 ± 0.0047     | 0.0046 ± 0.0013             | 0.0042 ± 0.0013 <sup>b</sup> | 0.020 <sup>a</sup>           | 0.013 ± 0.0068               | 0.0030 ± 0.0020              |
| C10H11NO5                   | 0.030 ± 0.0090      | 0.028 ± 0.014               | /                            | 0.015 <sup>a</sup>           | /                            | /                            |
| C11H13NO5                   | 0.036 ± 0.016       | 0.062 ± 0.042               | 0.0028 <sup>a</sup>          | 0.015 <sup>a</sup>           | 0.0006 <sup>a</sup>          | /                            |
| C11H13NO6                   | 0.0064 ± 0.0050     | 0.0008 ± 0.0008             | 0.0096 ± 0.0013              | 0.0040 ± 0.0014 <sup>b</sup> | /                            | /                            |
| Subtotal                    | 0.44 ± 0.17         | 0.28 ± 0.18                 | 3.23 ± 0.50                  | 3.09 ± 0.81                  | 0.40 ± 0.14                  | 0.22 ± 0.088                 |
| OC ( $\mu\text{g m}^{-3}$ ) | 1113 ± 122          | 1090 ± 732                  | 110 ± 16.5                   | 149 ± 55.6                   | 936 ± 248                    | 2395 ± 1042                  |

<sup>a</sup> The compound was detected in only one of the three filter samples; <sup>b</sup> the compound was detected in two of the three filter samples or only two out of the three filters were available for measurement, the values reported here are average ± difference between the two measurements/2.

**Table S6. Continue**

| Compound                 | Home Stove                   |                              | Jiko Poa        |                              | Jiko Poa (HM)                |                              |
|--------------------------|------------------------------|------------------------------|-----------------|------------------------------|------------------------------|------------------------------|
|                          | CS                           | HS                           | CS              | HS                           | CS                           | HS                           |
| C6H5NO3                  | 0.0028 ± 0.0007 <sup>b</sup> | 0.0040 ± 0.0021 <sup>b</sup> | 0.0023 ± 0.0017 | 0.0027 <sup>a</sup>          | 0.0011 ± 0.0004 <sup>b</sup> | 0.0024 ± 0.0007 <sup>b</sup> |
| C7H7NO3                  | 0.0024 <sup>a</sup>          | 0.0012 ± 0.0007 <sup>b</sup> | 0.0005 ± 0.0001 | 0.0004 ± 0.0001 <sup>b</sup> | 0.0002 ± 0.0000 <sup>b</sup> | /                            |
| C6H5NO4                  | 0.041 ± 0.0009               | 0.044 ± 0.027                | 0.029 ± 0.0059  | 0.034 ± 0.0067 <sup>b</sup>  | 0.029 ± 0.011                | 0.044 ± 0.021                |
| C7H7NO4                  | 0.026 ± 0.0094               | 0.010 ± 0.0074               | 0.011 ± 0.0022  | 0.013 ± 0.0025 <sup>b</sup>  | 0.0096 ± 0.0022              | 0.016 ± 0.0056               |
| C8H7NO4                  | 0.039 ± 0.012                | 0.011 ± 0.0022 <sup>b</sup>  | 0.049 ± 0.014   | 0.061 ± 0.028 <sup>b</sup>   | 0.031 ± 0.0039 <sup>b</sup>  | 0.021 ± 0.011                |
| C8H9NO4                  | 0.020 ± 0.013                | 0.0023 ± 0.0018              | 0.0093 ± 0.0012 | 0.0085 ± 0.0036 <sup>b</sup> | 0.0071 ± 0.0022              | 0.010 ± 0.0023               |
| C8H5NO2                  | /                            | /                            | 0.24 ± 0.16     | 0.42 ± 0.14 <sup>b</sup>     | 0.0065 ± 0.0012              | 0.028 ± 0.013                |
| C7H7NO5                  | 0.0077 ± 0.0025 <sup>b</sup> | 0.0021 <sup>a</sup>          | 0.0069 ± 0.0022 | 0.0029 ± 0.0008 <sup>b</sup> | 0.0061 ± 0.0019              | 0.0075 ± 0.0036              |
| C10H7NO3                 | 0.13 ± 0.10                  | 0.12 ± 0.071                 | 0.093 ± 0.023   | 0.12 ± 0.017 <sup>b</sup>    | 0.051 ± 0.0092               | 0.090 ± 0.034                |
| C9H9NO4                  | 0.12 ± 0.034                 | 0.085 ± 0.029                | 0.060 ± 0.015   | 0.060 ± 0.023 <sup>b</sup>   | 0.057 ± 0.027                | 0.050 ± 0.026                |
| C8H7NO5                  | 0.10 ± 0.075                 | 0.11 ± 0.0061                | 0.027 ± 0.019   | 0.037 ± 0.0072 <sup>b</sup>  | 0.0028 <sup>a</sup>          | 0.0059 ± 0.0045              |
| C8H9NO5                  | 0.10 ± 0.046                 | 0.098 ± 0.087                | 0.018 ± 0.0061  | 0.026 ± 0.0096 <sup>b</sup>  | 0.0097 ± 0.0020              | 0.021 ± 0.0093               |
| C11H9NO3                 | 0.086 ± 0.054                | 0.057 ± 0.024 <sup>b</sup>   | 0.057 ± 0.0064  | 0.072 ± 0.028 <sup>b</sup>   | 0.026 ± 0.0036               | 0.056 ± 0.019                |
| C10H11NO4                | 0.024 ± 0.0024               | 0.047 ± 0.030                | 0.016 ± 0.0089  | 0.016 ± 0.0045 <sup>b</sup>  | 0.0093 ± 0.0043              | 0.013 ± 0.0067               |
| C10H11NO5                | 0.085 ± 0.047                | 0.040 ± 0.020                | 0.046 ± 0.022   | 0.045 ± 0.016 <sup>b</sup>   | 0.075 ± 0.038                | 0.10 ± 0.066                 |
| C11H13NO5                | 0.072 ± 0.017                | 0.099 ± 0.081                | 0.031 ± 0.0025  | 0.029 ± 0.0064 <sup>b</sup>  | 0.085 ± 0.060                | 0.13 ± 0.098                 |
| C11H13NO6                | 0.026 ± 0.0066               | 0.035 ± 0.032                | 0.0066 ± 0.0035 | 0.013 ± 0.0010 <sup>b</sup>  | 0.0045 ± 0.0030              | 0.016 ± 0.014                |
| Subtotal                 | 0.89 ± 0.21                  | 0.74 ± 0.40                  | 0.70 ± 0.090    | 0.96 ± 0.029 <sup>b</sup>    | 0.40 ± 0.18                  | 0.61 ± 0.32                  |
| OC (µg m <sup>-3</sup> ) | 149 ± 25.6                   | 212 ± 80.7                   | 574 ± 27.7      | 776 ± 66.0                   | 861 ± 161                    | 824 ± 164                    |

**Table S7. Average mass ratios (%) of individual NACs to OC (iNACoc%) in Q<sub>b</sub> samples for burning red oak in different household cookstoves.**

| Compound                 | 3-stone fire        |                              | EcoChula XXL       |                    | Envirofit G3300              |                    |
|--------------------------|---------------------|------------------------------|--------------------|--------------------|------------------------------|--------------------|
|                          | CS                  | HS                           | CS                 | HS                 | CS                           | HS                 |
| C6H5NO3                  | 0.0052 <sup>a</sup> | 0.0038 ± 0.0040              | 0.77 ± 0.16        | 0.75 ± 0.12        | 0.0049 ± 0.0035 <sup>b</sup> | 0.011 <sup>a</sup> |
| C7H7NO3                  | /                   | /                            | 0.077 ± 0.027      | 0.077 ± 0.0094     | 0.032 <sup>a</sup>           |                    |
| C6H5NO4                  | 0.17 ± 0.018        | 0.21 ± 0.19                  | 0.37 ± 0.20        | 0.90 ± 0.94        | 0.091 ± 0.016                | 0.14 ± 0.036       |
| C7H7NO4                  | 0.10 ± 0.039        | 0.11 ± 0.085                 | 0.033 ± 0.023      | 0.046 ± 0.042      | 0.095 ± 0.024                | 0.16 ± 0.050       |
| C8H7NO4                  | 0.090 ± 0.046       | 0.015 ± 0.011                | 0.026 <sup>a</sup> | 0.023 <sup>a</sup> | 0.12 ± 0.0077                | 0.14 ± 0.055       |
| C8H9NO4                  | 0.057 ± 0.0011      | 0.074 ± 0.022                | 0.013 ± 0.0034     | 0.015 ± 0.012      | 0.047 ± 0.022                | 0.099 ± 0.078      |
| C8H5NO2                  | /                   | /                            | /                  | /                  | /                            | /                  |
| C7H7NO5                  | 0.021 ± 0.0047      | 0.033 ± 0.033                | /                  | /                  | /                            | /                  |
| C10H7NO3                 | 0.25 ± 0.11         | 0.076 ± 0.10                 | 7.27 ± 2.60        | 4.21 ± 1.73        | 0.22 ± 0.12                  | 0.18 ± 0.22        |
| C9H9NO4                  | 0.17 ± 0.081        | 0.14 ± 0.13                  | 0.21 ± 0.11        | 0.20 ± 0.19        | 0.27 ± 0.050                 | 0.14 ± 0.041       |
| C8H7NO5                  | 0.023 ± 0.0058      | 0.019 ± 0.0050               | 0.15 ± 0.053       | 0.13 ± 0.026       | 0.33 ± 0.12                  | 0.082 ± 0.061      |
| C8H9NO5                  | 0.071 ± 0.034       | 0.073 ± 0.040                | 0.33 ± 0.12        | 0.32 ± 0.22        | 0.055 ± 0.028                | 0.031 ± 0.012      |
| C11H9NO3                 | 0.50 ± 0.24         | 0.10 ± 0.096                 | 1.11 ± 0.78        | 1.37 ± 0.31        | 0.26 ± 0.089                 | 0.25 ± 0.17        |
| C10H11NO4                | 0.047 ± 0.031       | 0.041 ± 0.025                | 0.021 ± 0.015      | 0.039 ± 0.063      | 0.052 ± 0.017                | 0.013 ± 0.0043     |
| C10H11NO5                | 0.25 ± 0.11         | 0.45 ± 0.40                  | /                  | /                  | /                            | /                  |
| C11H13NO5                | 0.11 ± 0.070        | 0.33 ± 0.33                  | 0.017 <sup>a</sup> | /                  | 0.0008 <sup>a</sup>          | /                  |
| C11H13NO6                | 0.0009 ± 0.0004     | 0.0060 ± 0.0053 <sup>b</sup> | /                  | /                  | /                            | /                  |
| Subtotal                 | 1.86 ± 0.76         | 1.67 ± 0.88                  | 10.4 ± 2.94        | 8.70 ± 1.78        | 1.56 ± 0.35                  | 1.23 ± 0.45        |
| OC (µg m <sup>-3</sup> ) | 132 ± 9.14          | 157 ± 66.3                   | 22.1 ± 2.44        | 27.2 ± 6.99        | 95.3 ± 22.9                  | 152 ± 34.0         |

<sup>a</sup> The compound was detected in only one of the three filter samples; <sup>b</sup> the compound was detected in two of the three filter samples or only two out of the three filters were available for measurement, the values reported here are average ± difference between the two measurements/2.

**Table S7. Continue**

| Compound                 | Home Stove                  |                              | Jiko Poa                    |                              | Jiko Poa (HM)             |                              |
|--------------------------|-----------------------------|------------------------------|-----------------------------|------------------------------|---------------------------|------------------------------|
|                          | CS                          | HS                           | CS                          | HS                           | CS                        | HS                           |
| C6H5NO3                  | 0.013 ± 0.012 <sup>b</sup>  | 0.0031 ± 0.0009 <sup>b</sup> | 0.0068 ± 0.0028             | 0.0059 <sup>a</sup>          | 0.00050 <sup>a</sup>      | 0.0023 ± 0.0017 <sup>b</sup> |
| C7H7NO3                  | /                           | /                            | 0.0013 ± 0.0002             | 0.0010 ± 0.0009 <sup>b</sup> | /                         | /                            |
| C6H5NO4                  | 0.13 ± 0.016                | 0.12 ± 0.035                 | 0.10 ± 0.027                | 0.11 ± 0.088 <sup>b</sup>    | 0.13 ± 0.044              | 0.21 ± 0.093                 |
| C7H7NO4                  | 0.069 ± 0.055               | 0.024 ± 0.0070               | 0.072 ± 0.012               | 0.063 ± 0.055 <sup>b</sup>   | 0.067 ± 0.014             | 0.090 ± 0.0052               |
| C8H7NO4                  | 0.063 ± 0.018 <sup>b</sup>  | /                            | 0.20 ± 0.074                | 0.20 ± 0.16 <sup>b</sup>     | 0.11 ± 0.015 <sup>b</sup> | 0.054 ± 0.039                |
| C8H9NO4                  | 0.052 ± 0.051               | 0.0042 ± 0.0025              | 0.068 ± 0.0068              | 0.053 ± 0.038 <sup>b</sup>   | 0.052 ± 0.026             | 0.053 ± 0.018                |
| C8H5NO2                  | /                           | /                            | 0.023 ± 0.0019 <sup>b</sup> | 0.12 ± 0.056 <sup>b</sup>    | 0.0046 <sup>a</sup>       | /                            |
| C7H7NO5                  | 0.018 ± 0.0079 <sup>b</sup> | 0.0045 <sup>a</sup>          | 0.010 ± 0.0008              | 0.0073 ± 0.0035 <sup>b</sup> | 0.024 ± 0.0034            | 0.037 ± 0.014                |
| C10H7NO3                 | 0.43 ± 0.46                 | 0.20 ± 0.15                  | 0.10 ± 0.0030               | 0.10 ± 0.060 <sup>b</sup>    | 0.051 ± 0.0018            | 0.12 ± 0.031                 |
| C9H9NO4                  | 0.49 ± 0.20                 | 0.35 ± 0.082                 | 0.23 ± 0.075                | 0.24 ± 0.099 <sup>b</sup>    | 0.20 ± 0.091              | 0.23 ± 0.14                  |
| C8H7NO5                  | 0.46 ± 0.22                 | 0.35 ± 0.18                  | 0.077 ± 0.026               | 0.10 ± 0.011 <sup>b</sup>    | 0.023 ± 0.019             | 0.034 ± 0.016                |
| C8H9NO5                  | 0.45 ± 0.13                 | 0.29 ± 0.030                 | 0.053 ± 0.0046              | 0.074 ± 0.050 <sup>b</sup>   | 0.070 ± 0.034             | 0.088 ± 0.012                |
| C11H9NO3                 | 0.31 ± 0.18                 | 0.11 ± 0.050 <sup>b</sup>    | 0.27 ± 0.023                | 0.27 ± 0.17 <sup>b</sup>     | 0.12 ± 0.0063             | 0.20 ± 0.016                 |
| C10H11NO4                | 0.094 ± 0.0035              | 0.11 ± 0.067                 | 0.031 ± 0.018               | 0.041 ± 0.015 <sup>b</sup>   | 0.038 ± 0.024             | 0.052 ± 0.039                |
| C10H11NO5                | 0.28 ± 0.13                 | 0.13 ± 0.041                 | 0.24 ± 0.059                | 0.23 ± 0.15 <sup>b</sup>     | 0.47 ± 0.17               | 0.43 ± 0.21                  |
| C11H13NO5                | 0.12 ± 0.069                | 0.064 ± 0.043                | 0.048 ± 0.012               | 0.048 ± 0.014 <sup>b</sup>   | 0.29 ± 0.23               | 0.28 ± 0.22                  |
| C11H13NO6                | /                           | 0.0050 <sup>a</sup>          | 0.0007 ± 0.0003             | 0.0012 <sup>a</sup>          | 0.0033 ± 0.0028           | 0.0030 ± 0.0013              |
| Subtotal                 | 2.96 ± 0.82                 | 1.74 ± 0.21                  | 1.53 ± 0.29                 | 1.65 ± 0.36 <sup>b</sup>     | 1.61 ± 0.54               | 1.87 ± 0.75                  |
| OC (µg m <sup>-3</sup> ) | 28.1 ± 3.25                 | 39.5 ± 0.92                  | 80.6 ± 6.49                 | 110 ± 15.7                   | 113 ± 12.3                | 115 ± 17.9                   |

**Table S8. Average mass ratios (%) of individual NACs to OC (iNACoc%) in  $Q_f$  samples for burning charcoal in different household cookstoves.**

| Compound                    | CH4400                       |                              | Éclair                       |                             | Jiko Koa                     |                              |
|-----------------------------|------------------------------|------------------------------|------------------------------|-----------------------------|------------------------------|------------------------------|
|                             | CS                           | HS                           | CS                           | HS                          | CS                           | HS                           |
| C6H5NO3                     | 0.047 ± 0.042                | 0.055 ± 0.035 <sup>b</sup>   | 0.010 ± 0.0037               | 0.0035 ± 0.0025             | 0.0062 ± 0.0067              | 0.0027 ± 0.0008              |
| C7H7NO3                     | 0.0090 ± 0.0053              | 0.0073 ± 0.0032              | 0.0027 ± 0.0014              | 0.0011 <sup>a</sup>         | 0.0038 ± 0.0002 <sup>b</sup> | 0.0011 <sup>a</sup>          |
| C6H5NO4                     | /                            | 0.030 <sup>a</sup>           | 0.019 ± 0.0025 <sup>b</sup>  | 0.041 ± 0.0038              | 0.073 <sup>a</sup>           | 0.033 ± 0.022                |
| C7H7NO4                     | 0.0045 <sup>a</sup>          | 0.0024 <sup>a</sup>          | 0.0030 ± 0.0005              | 0.024 ± 0.0035              | 0.040 ± 0.038 <sup>b</sup>   | 0.025 ± 0.028                |
| C8H7NO4                     | /                            | /                            | /                            | 0.0066 <sup>a</sup>         | /                            | /                            |
| C8H9NO4                     | 0.0015 ± 0.0008 <sup>b</sup> | 0.0023 ± 0.0016 <sup>b</sup> | 0.0041 ± 0.0004 <sup>b</sup> | 0.029 ± 0.0094              | 0.034 ± 0.032 <sup>b</sup>   | 0.025 ± 0.030                |
| C8H5NO2                     | /                            | /                            | 0.16 ± 0.13                  | 0.039 ± 0.030               | /                            | /                            |
| C7H7NO5                     | /                            | /                            | 0.00075 <sup>a</sup>         | 0.0056 ± 0.0031             | 0.011 <sup>a</sup>           | 0.0046 ± 0.0035 <sup>b</sup> |
| C10H7NO3                    | 0.17 ± 0.13                  | 0.17 ± 0.041                 | 0.077 ± 0.047                | 0.016 ± 0.011               | 0.055 ± 0.018                | 0.018 ± 0.016                |
| C9H9NO4                     | 0.010 <sup>a</sup>           | 0.025 <sup>a</sup>           | 0.0032 ± 0.0001 <sup>b</sup> | 0.028 ± 0.017               | /                            | /                            |
| C8H7NO5                     | 0.11 <sup>a</sup>            | 0.041 ± 0.022 <sup>b</sup>   | 0.015 ± 0.0047               | 0.0033 <sup>a</sup>         | 0.0083 ± 0.0043              | /                            |
| C8H9NO5                     | 0.094 ± 0.15                 | 0.20 ± 0.14                  | 0.12 ± 0.025                 | 0.030 ± 0.022               | 0.030 ± 0.011                | 0.016 ± 0.017                |
| C11H9NO3                    | 0.065 ± 0.065                | 0.13 ± 0.075                 | 0.061 ± 0.045                | 0.044 ± 0.044               | 0.064 ± 0.055                | 0.041 ± 0.031                |
| C10H11NO4                   | 0.0076 <sup>a</sup>          | 0.040 <sup>a</sup>           | 0.0015 ± 0.0006              | 0.0039 ± 0.0038             | /                            | 0.00088 <sup>a</sup>         |
| C10H11NO5                   | /                            | /                            | /                            | 0.016 ± 0.0064 <sup>b</sup> | /                            | 0.0013 <sup>a</sup>          |
| C11H13NO5                   | /                            | /                            | 0.0011 ± 0.0002 <sup>b</sup> | 0.0087 ± 0.0091             | 0.0022 <sup>a</sup>          | 0.0008 ± 0.0001 <sup>b</sup> |
| C11H13NO6                   | /                            | /                            | /                            | /                           | /                            | /                            |
| Subtotal                    | 0.43 ± 0.45                  | 0.61 ± 0.27                  | 0.47 ± 0.097                 | 0.28 ± 0.066                | 0.25 ± 0.17                  | 0.16 ± 0.077                 |
| OC ( $\mu\text{g m}^{-3}$ ) | 48.2 ± 20.4                  | 72.4 ± 41.9                  | 186 ± 67.7                   | 474 ± 21.8                  | 143 ± 94.8                   | 626 ± 313                    |

<sup>a</sup> The compound was detected in only one of the three filter samples; <sup>b</sup> the compound was detected in two of the three filter samples or only two out of the three filters were available for measurement, the values reported here are average ± difference between the two measurements/2.



**Table S8. Continue**

| Compound                 | Prakti Leo                   |                              | Zoom Jet                     |                              |
|--------------------------|------------------------------|------------------------------|------------------------------|------------------------------|
|                          | CS                           | HS                           | CS                           | HS                           |
| C6H5NO3                  | 0.015 ± 0.0033               | 0.0041 ± 0.0016              | 0.0095 ± 0.0020              | 0.0020 ± 0.0014              |
| C7H7NO3                  | 0.0039 ± 0.0030              | 0.0008 <sup>a</sup>          | 0.0039 ± 0.0015              | /                            |
| C6H5NO4                  | 0.016 ± 0.0062 <sup>b</sup>  | 0.040 ± 0.017                | 0.034 <sup>a</sup>           | 0.038 ± 0.029                |
| C7H7NO4                  | 0.0014 ± 0.0005 <sup>b</sup> | 0.038 ± 0.021                | 0.0037 ± 0.0021 <sup>b</sup> | 0.037 ± 0.030                |
| C8H7NO4                  | /                            | /                            | /                            | 0.0028 <sup>a</sup>          |
| C8H9NO4                  | 0.0038 ± 0.0002 <sup>b</sup> | 0.058 ± 0.034                | 0.015 <sup>a</sup>           | 0.040 ± 0.016                |
| C8H5NO2                  | /                            | /                            | /                            | /                            |
| C7H7NO5                  | 0.0031 <sup>a</sup>          | 0.0078 ± 0.0063              | 0.0062 <sup>a</sup>          | 0.0089 ± 0.0094              |
| C10H7NO3                 | 0.12 ± 0.093                 | 0.019 ± 0.0066               | 0.072 ± 0.032                | 0.030 ± 0.021                |
| C9H9NO4                  | 0.012 <sup>a</sup>           | 0.0060 <sup>a</sup>          | /                            | 0.019 <sup>a</sup>           |
| C8H7NO5                  | 0.042 ± 0.0029 <sup>b</sup>  | 0.0008 <sup>a</sup>          | 0.044 <sup>a</sup>           | /                            |
| C8H9NO5                  | 0.26 ± 0.15                  | 0.017 ± 0.0045               | 0.18 ± 0.26                  | 0.060 ± 0.087                |
| C11H9NO3                 | 0.089 ± 0.083                | 0.030 ± 0.0038               | 0.040 ± 0.018                | 0.064 ± 0.058                |
| C10H11NO4                | 0.0026 ± 0.0004 <sup>b</sup> | 0.0014 ± 0.0010              | /                            | 0.0019 ± 0.0008              |
| C10H11NO5                | /                            | 0.0019 ± 0.0007 <sup>b</sup> | /                            | 0.0017 ± 0.0001 <sup>b</sup> |
| C11H13NO5                | 0.0011                       | 0.0018 ± 0.0010 <sup>b</sup> | /                            | 0.0042 ± 0.0020              |
| C11H13NO6                | /                            | /                            | /                            | /                            |
| Subtotal                 | 0.54 ± 0.083                 | 0.22 ± 0.058                 | 0.34 ± 0.32                  | 0.29 ± 0.24                  |
| OC (µg m <sup>-3</sup> ) | 125 ± 63.4                   | 504 ± 92.2                   | 73.5 ± 13.4                  | 558 ± 347                    |

**Table S9. Average mass ratios (%) of individual NACs to OC (iNACoc%) in Q<sub>b</sub> samples for burning charcoal in different household cookstoves.**

| Compound                 | CH4400                       |                     | Éclair                       |                     | Jiko Koa                     |                               |
|--------------------------|------------------------------|---------------------|------------------------------|---------------------|------------------------------|-------------------------------|
|                          | CS                           | HS                  | CS                           | HS                  | CS                           | HS                            |
| C6H5NO3                  | 0.12 ± 0.010 <sup>b</sup>    | 0.056 ± 0.074       | 0.0083 ± 0.0049              | 0.0039 <sup>a</sup> | 0.071 <sup>a</sup>           | 0.0006 ± 0.00002 <sup>b</sup> |
| C7H7NO3                  | 0.020 ± 0.0058 <sup>b</sup>  | 0.0096 ± 0.0063     | 0.0035 ± 0.0011 <sup>b</sup> | 0.0014 <sup>a</sup> | 0.0046 ± 0.0026 <sup>b</sup> | /                             |
| C6H5NO4                  | /                            | 0.32 <sup>a</sup>   | 0.054 ± 0.012 <sup>b</sup>   | 0.14 ± 0.015        | 0.086 ± 0.074 <sup>b</sup>   | 0.11 ± 0.066                  |
| C7H7NO4                  | 0.029 <sup>a</sup>           | 0.064 <sup>a</sup>  | 0.0087 ± 0.0031              | 0.12 ± 0.051        | 0.11 ± 0.11 <sup>b</sup>     | 0.13 ± 0.12                   |
| C8H7NO4                  | /                            | /                   | /                            | 0.051 <sup>a</sup>  | /                            | /                             |
| C8H9NO4                  | 0.0031 ± 0.0024 <sup>b</sup> | 0.016 <sup>a</sup>  | 0.0091 ± 0.0032 <sup>b</sup> | 0.18 ± 0.13         | 0.092 ± 0.091 <sup>b</sup>   | 0.11 ± 0.11                   |
| C8H5NO2                  | /                            | /                   | /                            | /                   | /                            | /                             |
| C7H7NO5                  | /                            | /                   | /                            | 0.021 ± 0.011       | 0.030 <sup>a</sup>           | 0.0092 <sup>a</sup>           |
| C10H7NO3                 | 0.76 ± 0.023 <sup>b</sup>    | 0.43 ± 0.19         | 0.10 ± 0.084                 | 0.036 ± 0.035       | 0.10 ± 0.021                 | 0.0033 ± 0.040                |
| C9H9NO4                  | 0.041 <sup>a</sup>           | 0.037 <sup>a</sup>  | 0.0077 ± 0.0022 <sup>b</sup> | 0.070 ± 0.061       | /                            | 0.053 <sup>a</sup>            |
| C8H7NO5                  | 0.17 <sup>a</sup>            | 0.087 <sup>a</sup>  | 0.023 ± 0.012 <sup>b</sup>   | 0.013 ± 0.0019      | 0.011 <sup>a</sup>           | 0.037 <sup>a</sup>            |
| C8H9NO5                  | 0.23 ± 0.11 <sup>b</sup>     | 0.39 ± 0.14         | 0.33 ± 0.11                  | 0.20 ± 0.11         | 0.13 ± 0.074                 | 0.046 ± 0.025                 |
| C11H9NO3                 | 0.99 ± 0.36 <sup>b</sup>     | 0.37 ± 0.25         | 0.13 ± 0.086                 | 0.18 ± 0.18         | 0.23 ± 0.17                  | 0.11 ± 0.060                  |
| C10H11NO4                | 0.0067 <sup>a</sup>          | 0.0063 <sup>a</sup> | 0.0030 ± 0.0010 <sup>b</sup> | 0.019 ± 0.015       | /                            | 0.0099 <sup>a</sup>           |
| C10H11NO5                | /                            | /                   | 0.0007 <sup>a</sup>          | 0.075 ± 0.071       | /                            | 0.0011 <sup>a</sup>           |
| C11H13NO5                | /                            | /                   | 0.0033 <sup>a</sup>          | 0.041 ± 0.042       | 0.0063 <sup>a</sup>          | 0.0038 <sup>a</sup>           |
| C11H13NO6                | /                            | /                   | /                            | /                   | /                            | /                             |
| Subtotal                 | 2.25 ± 0.17 <sup>b</sup>     | 1.44 ± 0.20         | 0.65 ± 0.23                  | 1.12 ± 0.12         | 0.70 ± 0.51                  | 0.58 ± 0.20                   |
| OC (µg m <sup>-3</sup> ) | 19.2 ± 14.7 <sup>b</sup>     | 40.5 ± 15.3         | 59.0 ± 17.0                  | 131 ± 7.68          | 57.8 ± 30.8                  | 212 ± 69.7                    |

<sup>a</sup> The compound was detected in only one of the three filter samples; <sup>b</sup> the compound was detected in two of the three filter samples or only two out of the three filters were available for measurement, the values reported here are average ± difference between the two measurements/2.

**Table S9. Continue**

|                          | Prakti Leo                   |                             | Zoom Jet                     |                             |
|--------------------------|------------------------------|-----------------------------|------------------------------|-----------------------------|
|                          | CS                           | HS                          | CS                           | HS                          |
| C6H5NO3                  | 0.017 ± 0.017                | 0.0034 <sup>a</sup>         | 0.0065 ± 0.0046 <sup>b</sup> | /                           |
| C7H7NO3                  | 0.0046 ± 0.0025              | /                           | 0.0096 ± 0.010               | /                           |
| C6H5NO4                  | 0.049 ± 0.032 <sup>b</sup>   | 0.17 ± 0.14                 | 0.20 <sup>a</sup>            | 0.17 ± 0.11                 |
| C7H7NO4                  | 0.0063 ± 0.0046 <sup>b</sup> | 0.28 ± 0.29                 | 0.011 ± 0.017                | 0.19 ± 0.12                 |
| C8H7NO4                  | /                            | /                           | /                            | /                           |
| C8H9NO4                  | 0.011 ± 0.0062 <sup>b</sup>  | 0.31 ± 0.26                 | 0.065 <sup>a</sup>           | 0.18 ± 0.070                |
| C8H5NO2                  | /                            | /                           | /                            | /                           |
| C7H7NO5                  | 0.0041 <sup>a</sup>          | 0.052 ± 0.062               | /                            | 0.036 ± 0.027               |
| C10H7NO3                 | 0.13 ± 0.095                 | 0.026 ± 0.012               | 0.10 ± 0.12                  | 0.041 ± 0.041               |
| C9H9NO4                  | 0.078 <sup>a</sup>           | 0.048 ± 0.0056 <sup>b</sup> | /                            | 0.031 ± 0.013               |
| C8H7NO5                  | 0.072 ± 0.018 <sup>b</sup>   | 0.018 <sup>a</sup>          | /                            | 0.019 ± 0.0081 <sup>b</sup> |
| C8H9NO5                  | 0.57 ± 0.37                  | 0.13 ± 0.016                | 0.97 ± 1.51                  | 0.21 ± 0.24                 |
| C11H9NO3                 | 0.12 ± 0.072                 | 0.12 ± 0.012                | 0.24 ± 0.14                  | 0.18 ± 0.16                 |
| C10H11NO4                | 0.0051 ± 0.0007 <sup>b</sup> | 0.0081 ± 0.037              | 0.0051 <sup>a</sup>          | 0.0078 ± 0.0023             |
| C10H11NO5                | /                            | 0.021 ± 0.0014 <sup>b</sup> | /                            | 0.023 ± 0.017               |
| C11H13NO5                | /                            | 0.013 ± 0.013 <sup>b</sup>  | /                            | 0.025 ± 0.019               |
| C11H13NO6                | /                            | /                           | /                            | /                           |
| subtotal                 | 0.96 ± 0.33                  | 1.17 ± 0.75                 | 1.34 ± 1.64                  | 1.12 ± 0.76                 |
| OC (µg m <sup>-3</sup> ) | 43.1 ± 10.4                  | 149 ± 26.5                  | 22.6 ± 7.59                  | 157 ± 77.4                  |

**Table S10. Vapor pressure of five NAC standards at 25 °C ( $p^{0,*}_L$ ).**

| Standard compounds           | Formula                                        | $m/z$ , [M-H] <sup>-</sup> | $p^{0,*}_L$ (atm)     |
|------------------------------|------------------------------------------------|----------------------------|-----------------------|
| 4-Nitrophenol                | C <sub>6</sub> H <sub>5</sub> NO <sub>3</sub>  | 138.0196                   | $1.58 \times 10^{-5}$ |
| 2-Methyl-4-nitrophenol       | C <sub>7</sub> H <sub>7</sub> NO <sub>3</sub>  | 152.0353                   | $4.57 \times 10^{-6}$ |
| 4-Nitrocatechol              | C <sub>6</sub> H <sub>5</sub> NO <sub>4</sub>  | 154.0145                   | $3.37 \times 10^{-7}$ |
| 2-Methyl-5-nitrobenzoic acid | C <sub>8</sub> H <sub>7</sub> NO <sub>4</sub>  | 180.0302                   | $1.07 \times 10^{-8}$ |
| 2-Nitro-1-naphthol           | C <sub>10</sub> H <sub>7</sub> NO <sub>3</sub> | 188.0353                   | $4.62 \times 10^{-8}$ |

**Table S11. Average contributions (%) of individual NACs to Abs<sub>365</sub> of Q<sub>f</sub> extracts for burning red oak in different household cookstoves.**

| Compound  | 3-stone fire        |                | EcoChula XXL                |                            | Envirofit G3300              |                              |
|-----------|---------------------|----------------|-----------------------------|----------------------------|------------------------------|------------------------------|
|           | CS                  | SIM            | CS                          | HS                         | CS                           | HS                           |
| C6H5NO3   | 0.0040 ± 0.0007     | 0.024 ± 0.0005 | 0.090 ± 0.060               | 0.20 ± 0.12                | 0.0011 ± 0.0009 <sup>b</sup> | 0.0015 ± 0.0012 <sup>b</sup> |
| C7H7NO3   | 0.0007 <sup>a</sup> | /              | 0.010 ± 0.0071              | 0.23 ± 0.014               | 0.0032 <sup>a</sup>          | /                            |
| C6H5NO4   | 0.085 ± 0.023       | 0.13 ± 0.10    | 0.054 ± 0.0054              | 0.16 ± 0.12                | 0.059 ± 0.012                | 0.048 ± 0.011                |
| C7H7NO4   | 0.071 ± 0.029       | 0.090 ± 0.070  | 0.011 ± 0.0052              | 0.032 ± 0.039              | 0.039 ± 0.0025               | 0.041 ± 0.028                |
| C8H7NO4   | /                   | /              | /                           | /                          | /                            | /                            |
| C8H9NO4   | 0.046 ± 0.017       | 0.059 ± 0.018  | 0.0037 ± 0.0010             | 0.014 ± 0.0098             | 0.017 ± 0.0075               | 0.015 ± 0.022                |
| C8H5NO2   | /                   | /              | /                           | /                          | /                            | /                            |
| C7H7NO5   | 0.0059 ± 0.0026     | 0.023 ± 0.019  | /                           | /                          | /                            | /                            |
| C10H7NO3  | 0.12 ± 0.030        | 0.051 ± 0.027  | 0.90 ± 0.54                 | 1.92 ± 1.16                | 0.19 ± 0.076                 | 0.11 ± 0.049                 |
| C9H9NO4   | 0.060 ± 0.022       | 0.043 ± 0.016  | 0.016 ± 0.0023 <sup>b</sup> | 0.021 ± 0.014 <sup>b</sup> | 0.070 ± 0.018                | 0.026 ± 0.013                |
| C8H7NO5   | 0.020 <sup>a</sup>  |                | 0.037 ± 0.022               | 0.090 ± 0.075              | 0.25 ± 0.093                 | 0.069 ± 0.044                |
| C8H9NO5   | 0.040 ± 0.023       | 0.061 ± 0.029  | 0.10 ± 0.045                | 0.31 ± 0.29                | 0.056 ± 0.032                | 0.021 ± 0.072                |
| C11H9NO3  | 0.12 ± 0.064        | 0.037          | 0.18 ± 0.12                 | 0.36 ± 0.22                | 0.073 ± 0.023                | 0.055 ± 0.021                |
| C10H11NO4 | /                   | /              | /                           | /                          | /                            | /                            |
| C10H11NO5 | 0.13 ± 0.038        | 0.16 ± 0.090   | /                           | 0.068 <sup>a</sup>         | /                            | /                            |
| C11H13NO5 | /                   | /              | /                           | /                          | /                            | /                            |
| C11H13NO6 | /                   | /              | /                           | /                          | /                            | /                            |
| Subtotal  | 0.69 ± 0.25         | 0.63 ± 0.28    | 1.39 ± 0.78                 | 3.14 ± 1.91                | 0.76 ± 0.21                  | 0.39 ± 0.15                  |

<sup>a</sup> The compound was detected in only one of the three filter samples; <sup>b</sup> the compound was detected in two of the three filter samples or only two out of the three filters were available for measurement, the values reported here are average ± difference between the two measurements/2.

**Table S11. Continue**

| Compound  | Home Stove                   |                              | Jiko Poa        |                              | Jiko Poa (HM)                |                              |
|-----------|------------------------------|------------------------------|-----------------|------------------------------|------------------------------|------------------------------|
|           | CS                           | HS                           | CS              | HS                           | CS                           | HS                           |
| C6H5NO3   | 0.0017 ± 0.0000 <sup>b</sup> | 0.0036 ± 0.0015 <sup>b</sup> | 0.0015 ± 0.0011 | 0.0024 <sup>a</sup>          | 0.0011 ± 0.0004 <sup>b</sup> | 0.0014 ± 0.0004 <sup>b</sup> |
| C7H7NO3   | 0.0011 <sup>a</sup>          | 0.0012 ± 0.0007 <sup>b</sup> | 0.0004 ± 0.0001 | 0.0004 ± 0.0001 <sup>b</sup> | 0.0003 ± 0.0000 <sup>b</sup> | /                            |
| C6H5NO4   | 0.068 ± 0.021                | 0.11 ± 0.056                 | 0.051 ± 0.0030  | 0.070 ± 0.0014 <sup>b</sup>  | 0.079 ± 0.025                | 0.076 ± 0.035                |
| C7H7NO4   | 0.084 ± 0.056                | 0.045 ± 0.028                | 0.034 ± 0.0027  | 0.048 ± 0.0010 <sup>b</sup>  | 0.048 ± 0.014                | 0.050 ± 0.015                |
| C8H7NO4   | /                            | /                            | /               | /                            | /                            | /                            |
| C8H9NO4   | 0.062 ± 0.043                | 0.0099 ± 0.0073              | 0.030 ± 0.0006  | 0.031 ± 0.0083 <sup>b</sup>  | 0.036 ± 0.015                | 0.032 ± 0.0050               |
| C8H5NO2   | /                            | /                            | /               | /                            | /                            | /                            |
| C7H7NO5   | 0.027 ± 0.0018 <sup>b</sup>  | 0.0093 <sup>a</sup>          | 0.024 ± 0.0057  | 0.012 ± 0.0013 <sup>b</sup>  | 0.033 ± 0.010                | 0.026 ± 0.012                |
| C10H7NO3  | 0.10 ± 0.047                 | 0.15 ± 0.079                 | 0.087 ± 0.012   | 0.13 ± 0.0040 <sup>b</sup>   | 0.073 ± 0.0057               | 0.083 ± 0.029                |
| C9H9NO4   | 0.16 ± 0.0000 <sup>b</sup>   | /                            | 0.11 ± 0.016    | 0.12 ± 0.031 <sup>b</sup>    | 0.12 ± 0.057                 | 0.066 ± 0.031                |
| C8H7NO5   | 0.27 ± 0.13                  | 0.51 ± 0.13                  | 0.083 ± 0.052   | 0.14 ± 0.0025 <sup>b</sup>   | 0.016 <sup>a</sup>           | 0.018 ± 0.013                |
| C8H9NO5   | 0.31 ± 0.13                  | 0.46 ± 0.41                  | 0.061 ± 0.014   | 0.11 ± 0.021 <sup>b</sup>    | 0.052 ± 0.0063               | 0.073 ± 0.027                |
| C11H9NO3  | 0.071 ± 0.043                | 0.069 ± 0.027                | 0.054 ± 0.0040  | 0.076 ± 0.018 <sup>b</sup>   | 0.038 ± 0.0041               | 0.052 ± 0.014                |
| C10H11NO4 | /                            | /                            | /               | /                            | /                            | /                            |
| C10H11NO5 | 0.29 ± 0.19                  | 0.20 ± 0.083                 | 0.16 ± 0.016    | 0.21 ± 0.10 <sup>b</sup>     | 0.40 ± 0.19                  | 0.34 ± 0.22                  |
| C11H13NO5 | /                            | /                            | /               | /                            | /                            | /                            |
| C11H13NO6 | /                            | /                            | /               | /                            | /                            | /                            |
| subtotal  | 1.38 ± 0.48                  | 1.54 ± 0.56                  | 0.69 ± 0.093    | 0.94 ± 0.025 <sup>b</sup>    | 0.88 ± 0.27                  | 0.82 ± 0.37                  |

**Table S12. Average contributions (%) of individual NACs to Abs<sub>365</sub> of Q<sub>b</sub> extracts for burning red oak in different household cookstoves.**

| Compound  | 3-stone fire        |                 | EcoChula XXL  |                    | Envirofit G3300              |                    |
|-----------|---------------------|-----------------|---------------|--------------------|------------------------------|--------------------|
|           | CS                  | HS              | CS            | HS                 | CS                           | HS                 |
| C6H5NO3   | 0.0076 <sup>a</sup> | 0.0060 ± 0.0060 | 0.69 ± 0.20   | 0.63 ± 0.25        | 0.0079 ± 0.0062 <sup>b</sup> | 0.011 <sup>a</sup> |
| C7H7NO3   | /                   | /               | 0.089 ± 0.030 | 0.081 ± 0.018      | 0.051 <sup>a</sup>           | /                  |
| C6H5NO4   | 0.64 ± 0.029        | 0.97 ± 0.83     | 0.85 ± 0.32   | 2.05 ± 1.83        | 0.35 ± 0.074                 | 0.46 ± 0.024       |
| C7H7NO4   | 0.72 ± 0.24         | 0.89 ± 0.67     | 0.14 ± 0.060  | 0.24 ± 0.28        | 0.67 ± 0.11                  | 1.05 ± 0.48        |
| C8H7NO4   | /                   | /               | /             | /                  | /                            | /                  |
| C8H9NO4   | 0.41 ± 0.036        | 0.63 ± 0.14     | 0.062 ± 0.025 | 0.078 ± 0.084      | 0.33 ± 0.13                  | 0.64 ± 0.47        |
| C8H5NO2   | /                   | /               | /             | /                  | /                            | /                  |
| C7H7NO5   | 0.16 ± 0.026        | 0.31 ± 0.29     | /             | /                  | /                            | /                  |
| C10H7NO3  | 0.50 ± 0.21         | 0.18 ± 0.23     | 9.55 ± 1.73   | 5.65 ± 3.70        | 0.45 ± 0.22                  | 0.29 ± 0.31        |
| C9H9NO4   | 0.40 ± 0.18         | 0.30 ± 0.11     | /             | 0.032 <sup>a</sup> | 0.86 ± 0.12                  | 0.57 ± 0.17        |
| C8H7NO5   | 0.16 ± 0.036        | 0.16 ± 0.020    | 0.66 ± 0.070  | 0.58 ± 0.29        | 2.28 ± 0.57                  | 0.47 ± 0.28        |
| C8H9NO5   | 0.53 ± 0.24         | 0.67 ± 0.33     | 1.63 ± 0.20   | 1.73 ± 1.67        | 0.45 ± 0.31                  | 0.21 ± 0.036       |
| C11H9NO3  | 1.01 ± 0.44         | 0.24 ± 0.22     | 1.57 ± 1.13   | 1.74 ± 0.60        | 0.54 ± 0.18                  | 0.42 ± 0.21        |
| C10H11NO4 | /                   | /               | /             | /                  | /                            | /                  |
| C10H11NO5 | 1.91 ± 0.78         | 3.90 ± 3.01     | /             | /                  | /                            | /                  |
| C11H13NO5 | /                   | /               | /             | /                  | /                            | /                  |
| C11H13NO6 | /                   | /               | /             | /                  | /                            | /                  |
| subtotal  | 6.44 ± 1.96         | 8.27 ± 2.86     | 15.2 ± 0.75   | 12.8 ± 6.46        | 5.95 ± 0.62                  | 4.10 ± 0.33        |

<sup>a</sup> The compound was detected in only one of the three filter samples; <sup>b</sup> the compound was detected in two of the three filter samples or only two out of the three filters were available for measurement, the values reported here are average ± difference between the two measurements/2.

**Table S12. Continue**

| Compound  | Home Stove                 |                              | Jiko Poa        |                              | Jiko Poa (HM)       |                              |
|-----------|----------------------------|------------------------------|-----------------|------------------------------|---------------------|------------------------------|
|           | CS                         | HS                           | CS              | HS                           | CS                  | HS                           |
| C6H5NO3   | 0.016 ± 0.014 <sup>b</sup> | 0.0061 ± 0.0019 <sup>b</sup> | 0.0075 ± 0.0033 | 0.0079 <sup>a</sup>          | 0.0009 <sup>a</sup> | 0.0037 ± 0.0017 <sup>b</sup> |
| C7H7NO3   | /                          | /                            | 0.0019 ± 0.0003 | 0.0018 ± 0.0011 <sup>b</sup> | /                   | /                            |
| C6H5NO4   | 0.61 ± 0.32                | 0.95 ± 0.59                  | 0.33 ± 0.078    | 0.41 ± 0.24 <sup>b</sup>     | 0.69 ± 0.21         | 1.03 ± 0.38                  |
| C7H7NO4   | 0.57 ± 0.39                | 0.33 ± 0.17                  | 0.42 ± 0.061    | 0.45 ± 0.28 <sup>b</sup>     | 0.66 ± 0.18         | 0.86 ± 0.16                  |
| C8H7NO4   | /                          | /                            | /               | /                            | /                   | /                            |
| C8H9NO4   | 0.43 ± 0.34                | 0.050 ± 0.019                | 0.40 ± 0.032    | 0.37 ± 0.19 <sup>b</sup>     | 0.52 ± 0.29         | 0.52 ± 0.24                  |
| C8H5NO2   | /                          | /                            | /               | /                            | /                   | /                            |
| C7H7NO5   | 0.16 ± 0.017 <sup>b</sup>  | 0.048 <sup>a</sup>           | 0.065 ± 0.0050  | 0.056 ± 0.020 <sup>b</sup>   | 0.25 ± 0.034        | 0.37 ± 0.13                  |
| C10H7NO3  | 0.96 ± 0.81                | 0.92 ± 1.00                  | 0.17 ± 0.0043   | 0.21 ± 0.090 <sup>b</sup>    | 0.15 ± 0.0042       | 0.32 ± 0.035                 |
| C9H9NO4   | 1.21 ± 0.015 <sup>b</sup>  | /                            | 0.79 ± 0.24     | 0.89 ± 0.40 <sup>b</sup>     | 0.81 ± 0.33         | 0.37 ± 0.19                  |
| C8H7NO5   | 3.81 ± 1.65                | 4.53 ± 2.00                  | 0.45 ± 0.15     | 0.73 ± 0.062 <sup>b</sup>    | 0.24 ± 0.20         | 0.33 ± 0.18                  |
| C8H9NO5   | 4.22 ± 2.20                | 4.24 ± 1.52                  | 0.33 ± 0.020    | 0.57 ± 0.28 <sup>b</sup>     | 0.76 ± 0.41         | 0.90 ± 0.20                  |
| C11H9NO3  | 0.81 ± 0.57                | 0.53 ± 0.36 <sup>b</sup>     | 0.46 ± 0.027    | 0.55 ± 0.26 <sup>b</sup>     | 0.34 ± 0.0043       | 0.54 ± 0.053                 |
| C10H11NO4 | /                          | /                            | /               | /                            | /                   | /                            |
| C10H11NO5 | 2.72 ± 1.78                | 1.94 ± 0.88                  | 1.49 ± 0.35     | 1.72 ± 0.79 <sup>b</sup>     | 4.97 ± 1.53         | 4.35 ± 2.08                  |
| C11H13NO5 | /                          | /                            | /               | /                            | /                   | /                            |
| C11H13NO6 | /                          | /                            | /               | /                            | /                   | /                            |
| subtotal  | 15.0 ± 6.21                | 13.3 ± 5.28                  | 4.91 ± 0.85     | 5.96 ± 1.04                  | 9.38 ± 1.10         | 9.59 ± 2.35                  |

<sup>a</sup> The compound was detected in only one of the three filter samples; <sup>b</sup> the compound was detected in two of the three filter samples or only two out of the three filters were available for measurement, the values reported here are average ± difference between the two measurements/2.



**Table S13. Average contributions (%) of individual NACs to Abs<sub>365</sub> of Q<sub>f</sub> extracts for burning charcoal in different household cookstoves.**

| Compound  | CH4400                       |                            | Éclair                      |                     | Jiko Koa                     |                              |
|-----------|------------------------------|----------------------------|-----------------------------|---------------------|------------------------------|------------------------------|
|           | CS                           | HS                         | CS                          | HS                  | CS                           | HS                           |
| C6H5NO3   | 0.081 ± 0.11                 | 0.087 ± 0.067 <sup>b</sup> | 0.032 ± 0.020               | 0.0054 ± 0.0034     | 0.0088 ± 0.0075              | 0.0037 ± 0.0002 <sup>b</sup> |
| C7H7NO3   | 0.017 ± 0.022                | 0.014 ± 0.0088             | 0.011 ± 0.0082              | 0.0022 <sup>a</sup> | 0.0093 ± 0.0051 <sup>b</sup> | 0.0015 <sup>a</sup>          |
| C6H5NO4   | /                            | 0.092 <sup>a</sup>         | 0.13 ± 0.014 <sup>b</sup>   | 0.19 ± 0.0013       | 0.17 <sup>a</sup>            | 0.13 ± 0.082                 |
| C7H7NO4   | 0.019 <sup>a</sup>           | 0.013 <sup>a</sup>         | 0.039 ± 0.0036 <sup>b</sup> | 0.21 ± 0.050        | 0.18 ± 0.15 <sup>b</sup>     | 0.19 ± 0.19                  |
| C8H7NO4   | /                            | /                          | /                           | /                   | /                            | /                            |
| C8H9NO4   | 0.0091 ± 0.0009 <sup>b</sup> | 0.020 ± 0.016 <sup>b</sup> | 0.053 ± 0.0070 <sup>b</sup> | 0.25 ± 0.096        | 0.16 ± 0.13 <sup>b</sup>     | 0.19 ± 0.20                  |
| C8H5NO2   | /                            | /                          | /                           | /                   | /                            | /                            |
| C7H7NO5   | /                            | /                          | 0.0083 <sup>a</sup>         | 0.054 ± 0.033       | 0.051 <sup>a</sup>           | 0.037 ± 0.025 <sup>b</sup>   |
| C10H7NO3  | 0.43 ± 0.57                  | 0.37 ± 0.16                | 0.31 ± 0.073                | 0.038 ± 0.023       | 0.15 ± 0.15                  | 0.035 ± 0.024                |
| C9H9NO4   | /                            | /                          | /                           | /                   | /                            | /                            |
| C8H7NO5   | 1.25 <sup>a</sup>            | 0.35 ± 0.22 <sup>b</sup>   | 0.25 ± 0.13                 | 0.026 <sup>a</sup>  | 0.070 ± 0.064                | /                            |
| C8H9NO5   | 1.14 ± 1.90                  | 1.73 ± 1.63                | 2.05 ± 0.73                 | 0.27 ± 0.17         | 0.30 ± 0.16                  | 0.11 ± 0.10                  |
| C11H9NO3  | 0.18 ± 0.26                  | 0.25 ± 0.13                | 0.24 ± 0.082                | 0.10 ± 0.095        | 0.12 ± 0.079                 | 0.079 ± 0.046                |
| C10H11NO4 | /                            | /                          | /                           | /                   | /                            | /                            |
| C10H11NO5 | /                            | /                          | /                           | 0.16 ± 0.055        | /                            | 0.010 <sup>a</sup>           |
| C11H13NO5 | /                            | /                          | /                           | /                   | /                            | /                            |
| C11H13NO6 | /                            | /                          | /                           | /                   | /                            | /                            |
| subtotal  | 2.27 ± 3.59                  | 2.71 ± 2.20                | 3.03 ± 0.72                 | 1.24 ± 0.065        | 0.95 ± 0.51                  | 0.7675                       |

<sup>a</sup> The compound was detected in only one of the three filter samples; <sup>b</sup> the compound was detected in two of the three filter samples or only two out of the three filters were available for measurement, the values reported here are average ± difference between the two measurements/2.

**Table S13. Continue**

| Compound  | Prakti Leo                   |                              | Zoom Jet                    |                             |
|-----------|------------------------------|------------------------------|-----------------------------|-----------------------------|
|           | CS                           | HS                           | CS                          | HS                          |
| C6H5NO3   | 0.015 ± 0.0098               | 0.0074 ± 0.0041              | 0.010 ± 0.0044              | 0.0028 ± 0.0015             |
| C7H7NO3   | 0.0039 ± 0.0010 <sup>b</sup> | 0.0027 ± 0.0011 <sup>b</sup> | 0.0059 ± 0.0035             | /                           |
| C6H5NO4   | 0.21 ± 0.14 <sup>b</sup>     | 0.12 ± 0.11                  | 0.069 <sup>a</sup>          | 0.15 ± 0.094                |
| C7H7NO4   | 0.46 ± 0.45 <sup>b</sup>     | 0.17 ± 0.20                  | 0.016 ± 0.0053 <sup>b</sup> | 0.27 ± 0.18                 |
| C8H7NO4   | /                            | /                            | /                           | /                           |
| C8H9NO4   | 0.88 ± 0.85 <sup>b</sup>     | 0.22 ± 0.25                  | 0.055 <sup>a</sup>          | 0.30 ± 0.068                |
| C8H5NO2   | /                            | /                            | /                           | /                           |
| C7H7NO5   | 0.082 ± 0.062 <sup>b</sup>   | 0.065 ± 0.045 <sup>b</sup>   | 0.025 <sup>a</sup>          | 0.067 ± 0.065               |
| C10H7NO3  | 0.12 ± 0.034                 | 0.078 ± 0.053                | 0.12 ± 0.071                | 0.063 ± 0.034               |
| C9H9NO4   | /                            | /                            | /                           | /                           |
| C8H7NO5   | 0.21 ± 0.18                  | /                            | 0.16 <sup>a</sup>           | /                           |
| C8H9NO5   | 1.86 ± 1.27                  | 0.17 ± 0.056                 | 0.76 ± 1.01                 | 0.45 ± 0.62                 |
| C11H9NO3  | 0.11 ± 0.058                 | 0.082 ± 0.029                | 0.065 ± 0.039               | 0.13 ± 0.10                 |
| C10H11NO4 | /                            | /                            | /                           | /                           |
| C10H11NO5 | 0.059 <sup>a</sup>           | 0.0090 <sup>a</sup>          | /                           | 0.016 ± 0.0020 <sup>b</sup> |
| C11H13NO5 | /                            | /                            | /                           | /                           |
| C11H13NO6 | /                            | /                            | /                           | /                           |
| subtotal  | 3.43 ± 0.42                  | 0.89 ± 0.49                  | 1.08 ± 1.14                 | 1.44 ± 1.13                 |

**Table S14. Average contributions (%) of individual NACs to Abs<sub>365</sub> of Q<sub>b</sub> extracts for burning charcoal in different household cookstoves.**

| Compound  | CH4400                     |                   | Éclair                     |                     | Jiko Koa                 |                              |
|-----------|----------------------------|-------------------|----------------------------|---------------------|--------------------------|------------------------------|
|           | CS                         | HS                | CS                         | HS                  | CS                       | HS                           |
| C6H5NO3   | 0.37 ± 0.35 <sup>b</sup>   | 0.31 ± 0.35       | 0.076 ± 0.091              | 0.012 <sup>a</sup>  | /                        | 0.0018 ± 0.0007 <sup>b</sup> |
| C7H7NO3   | 0.066 ± 0.043 <sup>b</sup> | 0.081 ± 0.063     | 0.043 ± 0.034 <sup>b</sup> | 0.0057 <sup>a</sup> | 0.014 <sup>a</sup>       | /                            |
| C6H5NO4   | /                          | 1.76 <sup>a</sup> | 0.65 ± 0.071 <sup>b</sup>  | 1.21 ± 0.25         | 0.66 ± 0.48 <sup>b</sup> | 1.17 ± 0.90                  |
| C7H7NO4   | 0.19 <sup>a</sup>          | 0.64 <sup>a</sup> | 0.18 ± 0.0070 <sup>b</sup> | 1.89 ± 0.74         | 1.50 ± 1.47 <sup>b</sup> | 2.81 ± 2.86                  |
| C8H7NO4   | /                          | /                 | /                          | /                   | /                        | /                            |
| C8H9NO4   | 0.024 ± 0.012 <sup>b</sup> | 0.16 <sup>a</sup> | 0.19 ± 0.0046 <sup>b</sup> | 2.86 ± 2.26         | 1.21 ± 1.19 <sup>b</sup> | 2.51 ± 2.70                  |
| C8H5NO2   | /                          | /                 | /                          | /                   | /                        | /                            |
| C7H7NO5   | /                          | /                 | /                          | 0.36 ± 0.17         | 0.42 <sup>a</sup>        | 0.19 <sup>a</sup>            |
| C10H7NO3  | 2.57 ± 1.07 <sup>b</sup>   | 4.92 ± 5.69       | 0.79 ± 0.12                | 0.16 ± 0.17         | 0.66 ± 0.34 <sup>b</sup> | 0.11 ± 0.084                 |
| C9H9NO4   | /                          | /                 | /                          | /                   | /                        | /                            |
| C8H7NO5   | 2.94 <sup>a</sup>          | 2.29 <sup>a</sup> | 0.64 ± 0.47 <sup>b</sup>   | 0.20 ± 0.050        | 0.15 <sup>a</sup>        | 0.72 <sup>a</sup>            |
| C8H9NO5   | 3.61 ± 2.71 <sup>b</sup>   | 13.9 ± 10.3       | 13.4 ± 7.65                | 3.28 ± 1.93         | 2.01 ± 0.67 <sup>b</sup> | 0.74 ± 0.031                 |
| C11H9NO3  | 2.69 ± 0.077 <sup>b</sup>  | 2.69 ± 1.74       | 1.15 ± 0.31                | 0.84 ± 0.87         | 1.73 ± 0.22 <sup>b</sup> | 0.48 ± 0.16                  |
| C10H11NO4 | /                          | /                 | /                          | /                   | /                        | /                            |
| C10H11NO5 | /                          | /                 | /                          | 1.29 ± 1.31         | /                        | 0.023 <sup>a</sup>           |
| C11H13NO5 | /                          | /                 | /                          | /                   | /                        | /                            |
| C11H13NO6 | /                          | /                 | /                          | /                   | /                        | /                            |
| Subtotal  | 10.9 ± 5.46                | 23.6 ± 15.7       | 16.5 ± 7.50                | 12.1 ± 1.95         | 8.07 ± 3.53              | 8.12 ± 6.41                  |

<sup>a</sup> The compound was detected in only one of the three filter samples; <sup>b</sup> the compound was detected in two of the three filter samples or only two out of the three filters were available for measurement, the values reported here are average ± difference between the two measurements/2.

**Table S14. Continue**

| Compound  | Prakti Leo                  |                              | Zoom Jet                    |                          |
|-----------|-----------------------------|------------------------------|-----------------------------|--------------------------|
|           | CS                          | HS                           | CS                          | HS                       |
| C6H5NO3   | 0.070 ± 0.046 <sup>b</sup>  | 0.0088 ± 0.0016 <sup>b</sup> | 0.012 ± 0.0007 <sup>b</sup> | /                        |
| C7H7NO3   | 0.015 ± 0.0077 <sup>b</sup> | 0.0090 <sup>a</sup>          | 0.063 ± 0.065               | /                        |
| C6H5NO4   | 3.20 ± 2.48 <sup>b</sup>    | 1.20 ± 1.61                  | 0.65 <sup>a</sup>           | 3.32 ± 3.89              |
| C7H7NO4   | 8.12 ± 7.94 <sup>b</sup>    | 3.65 ± 5.60                  | 0.19                        | 6.72 ± 7.80              |
| C8H7NO4   | /                           | /                            | /                           | /                        |
| C8H9NO4   | 11.7 ± 11.4 <sup>b</sup>    | 3.68 ± 5.41                  | 0.39 <sup>a</sup>           | 5.07 ± 3.52              |
| C8H5NO2   | /                           | /                            | /                           | /                        |
| C7H7NO5   | 1.16 ± 1.08 <sup>b</sup>    | 1.18 ± 1.05 <sup>b</sup>     | /                           | 1.41 ± 1.77              |
| C10H7NO3  | 0.50 ± 0.27                 | 0.20 ± 0.16                  | 0.93 ± 0.75                 | 0.47 ± 0.65              |
| C9H9NO4   | /                           | /                            | /                           | /                        |
| C8H7NO5   | 1.32 ± 0.37                 | /                            | /                           | 0.74 ± 0.53 <sup>b</sup> |
| C8H9NO5   | 13.2 ± 2.83                 | 1.86 ± 0.72                  | 7.73 ± 8.55                 | 9.29 ± 13.6              |
| C11H9NO3  | 1.33 ± 1.68                 | 0.47 ± 0.13                  | 1.18 ± 1.00 <sup>b</sup>    | 1.99 ± 2.63              |
| C10H11NO4 | /                           | /                            | /                           | /                        |
| C10H11NO5 | 2.07 <sup>a</sup>           | 0.36 <sup>a</sup>            | /                           | 0.89 ± 1.06              |
| C11H13NO5 | /                           | /                            | /                           | /                        |
| C11H13NO6 | /                           | /                            | /                           | /                        |
| Subtotal  | 33.2 ± 29.1                 | 12.0 ± 14.2                  | 10.1 ± 8.02                 | 29.7 ± 35.4              |

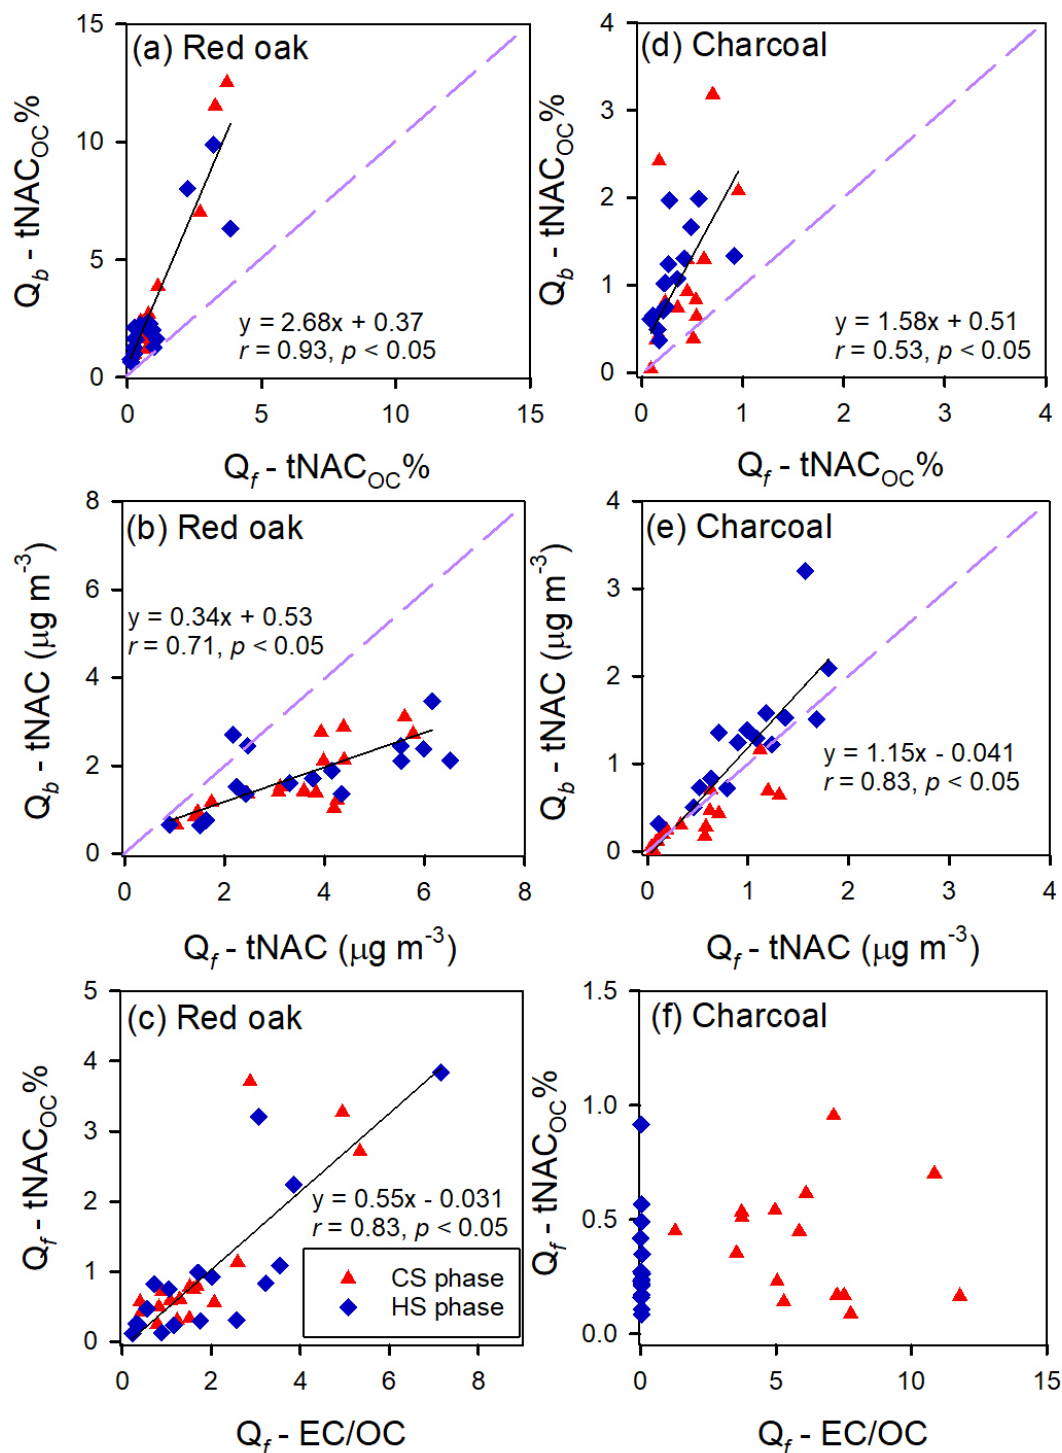

**Figure S1.** Linear regressions of (a, d)  $tNAC_{OC}\%$  in  $Q_f$  vs.  $Q_b$  samples, (b, e) total NAC concentrations in  $Q_f$  vs.  $Q_b$  samples, (c, f)  $tNAC_{OC}\%$  vs.  $EC/OC$  for  $Q_f$  samples for red oak and charcoal burning, respectively.

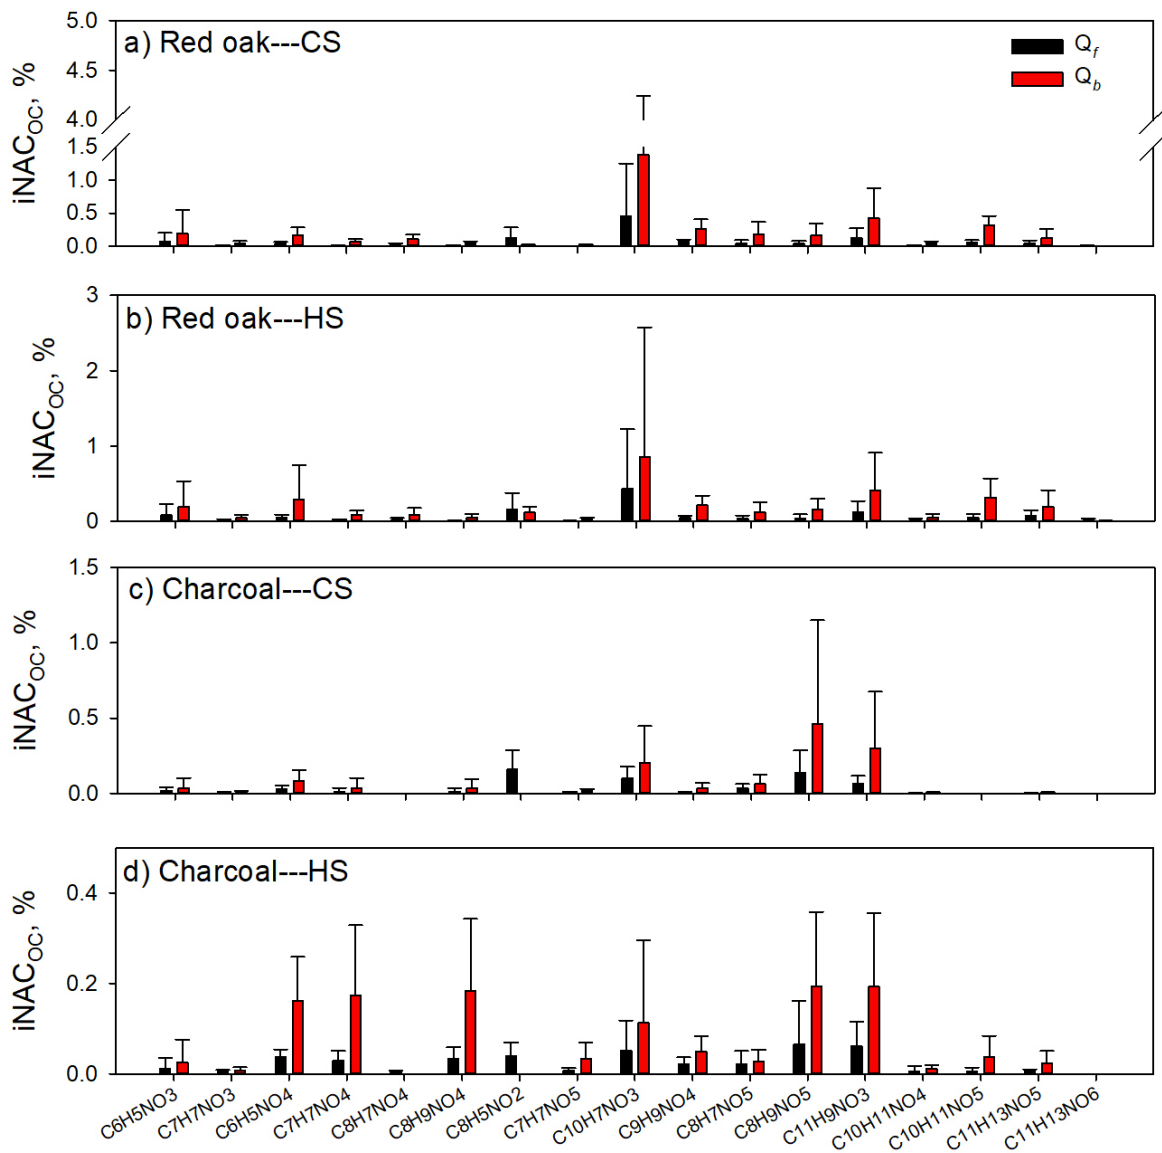

**Figure S2.** Average mass ratios of individual NACs to OC  $\times 100\%$  ( $iNAC_{OC}\%$ ) for (a) red oak burning under the CS phase, (b) red oak burning under the HS phase, (c) charcoal burning under the CS phase, and (d) charcoal burning under the HS phase.

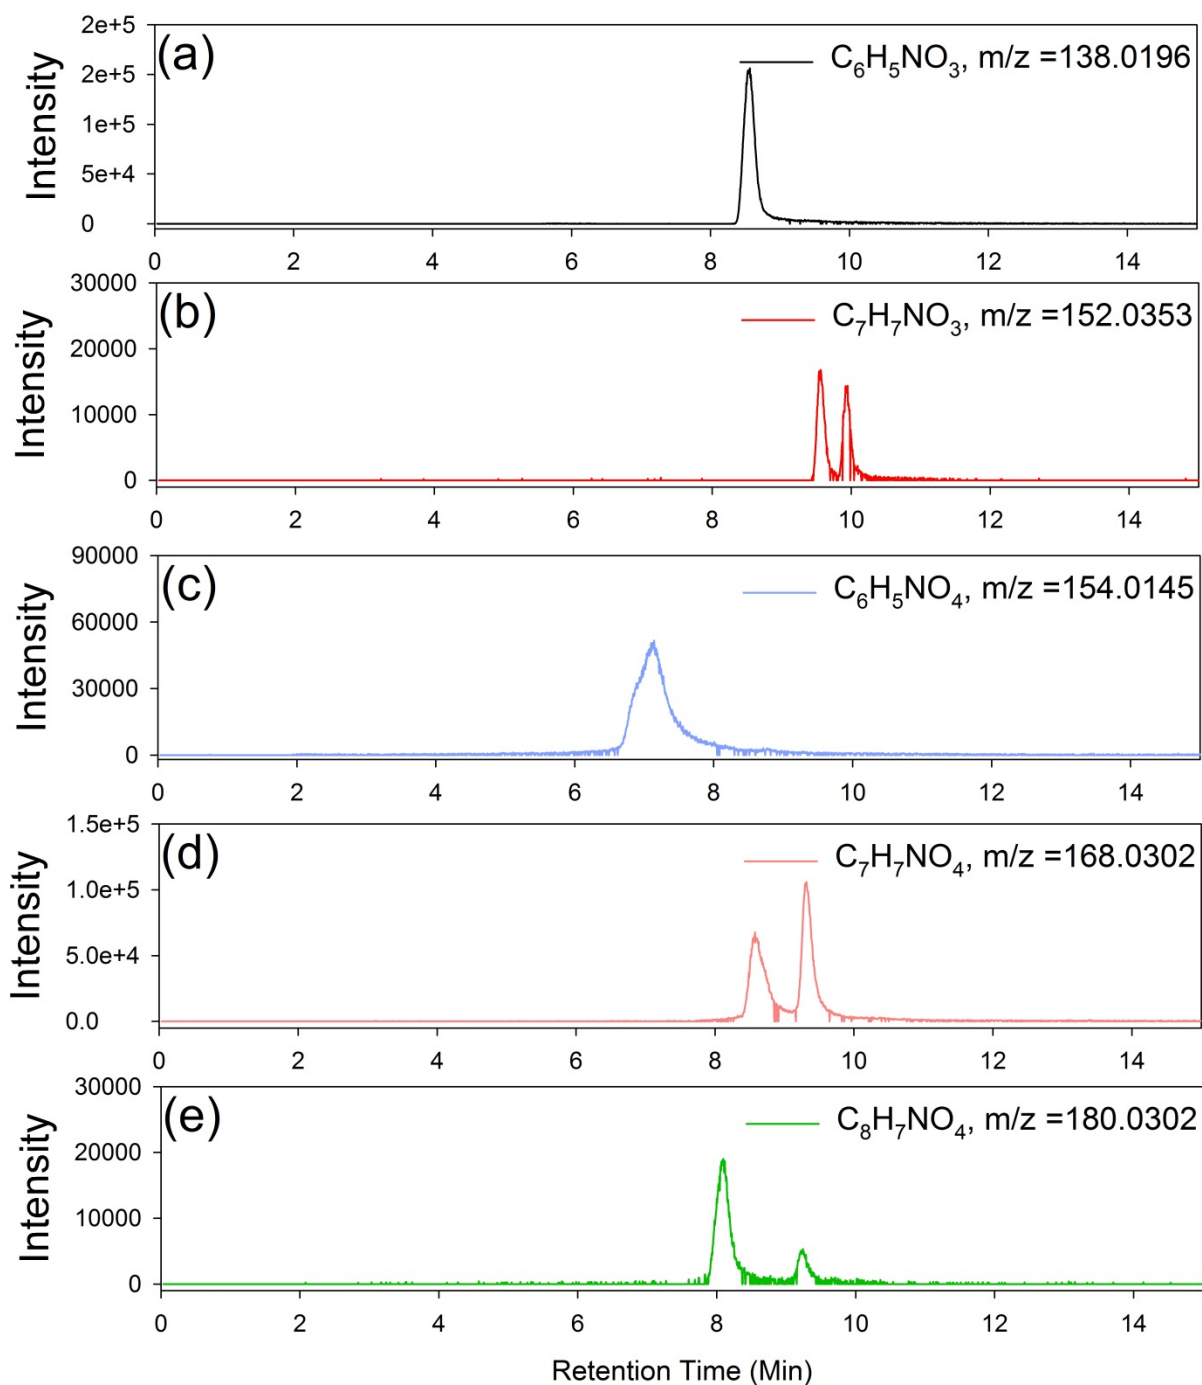

**Figure S3.** Extracted ion chromatograms (EIC) of (a)  $C_6H_5NO_3$ , (b)  $C_7H_7NO_3$ , (c)  $C_6H_5NO_4$ , (d)  $C_7H_7NO_4$ , (e)  $C_8H_7NO_4$ , (f)  $C_8H_9NO_4$ , (g)  $C_8H_5NO_2$ , (h)  $C_7H_7NO_5$ , (i)  $C_{10}H_7NO_3$ , (j)  $C_9H_9NO_4$ , (k)  $C_8H_7NO_5$ , (l)  $C_8H_9NO_5$ , (m)  $C_{11}H_9NO_3$ , (n)  $C_{10}H_{11}NO_4$ , (o)  $C_{10}H_{11}NO_5$ , (p)  $C_{11}H_{13}NO_5$  and (q)  $C_{11}H_{13}NO_6$  identified in emissions from solid fuel-cookstove combustions (Table S3).

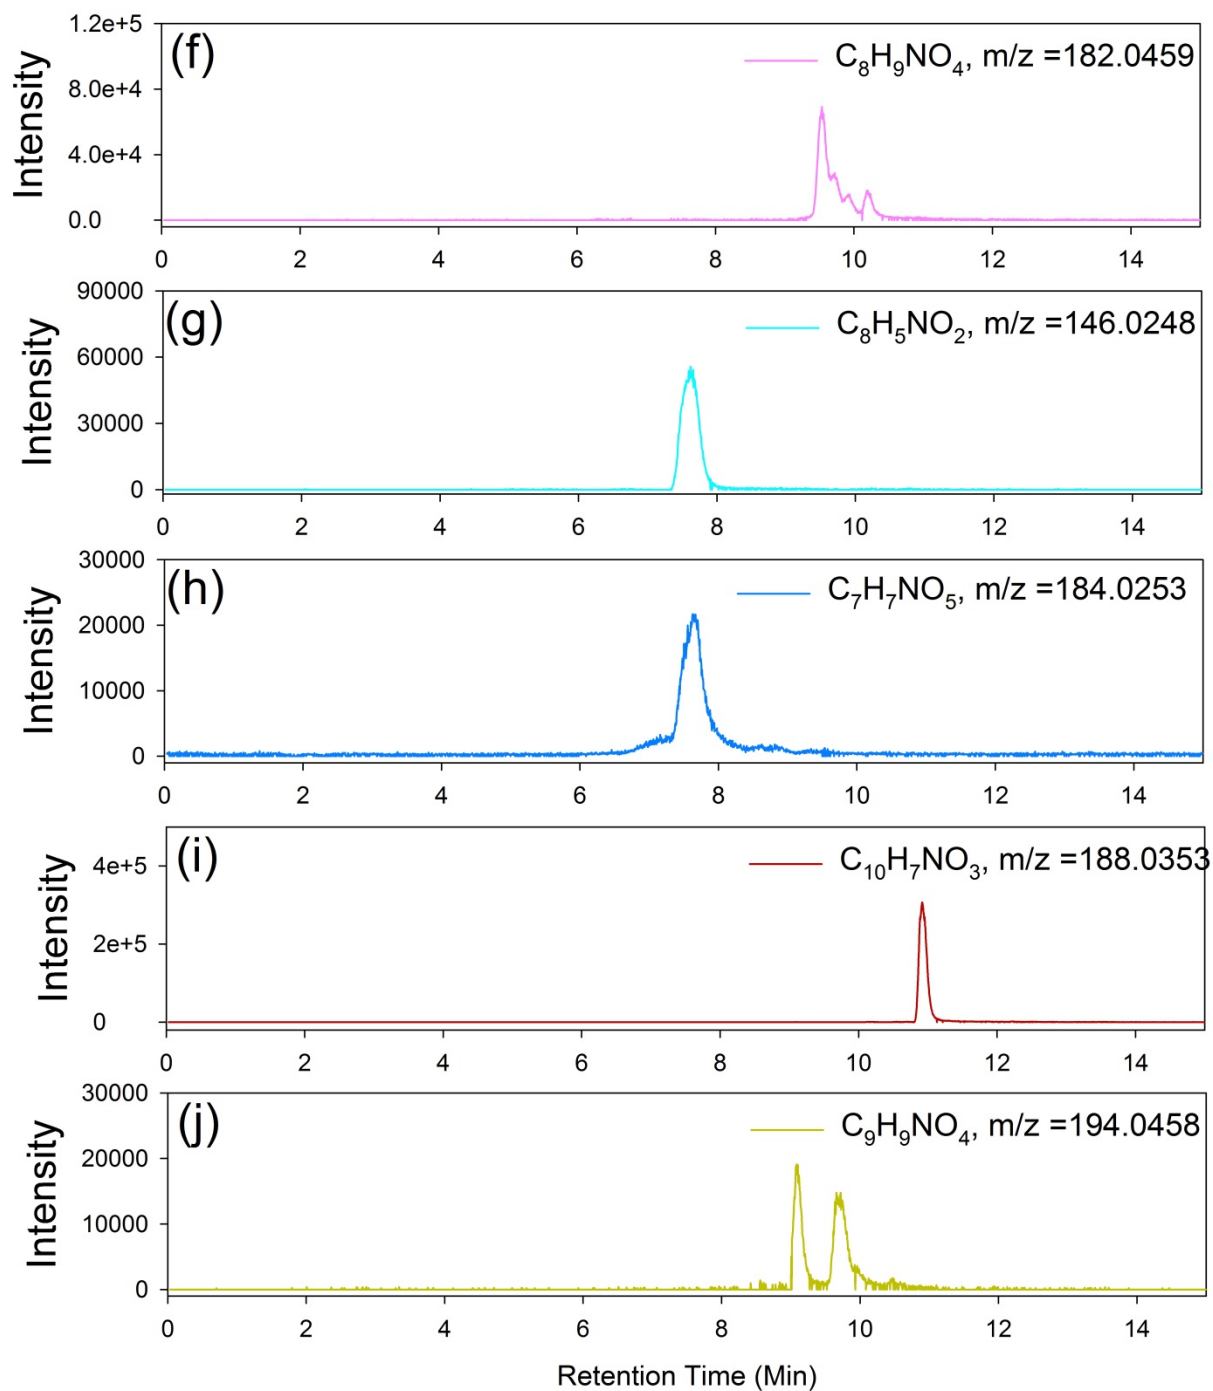

Figure S3. Continued.



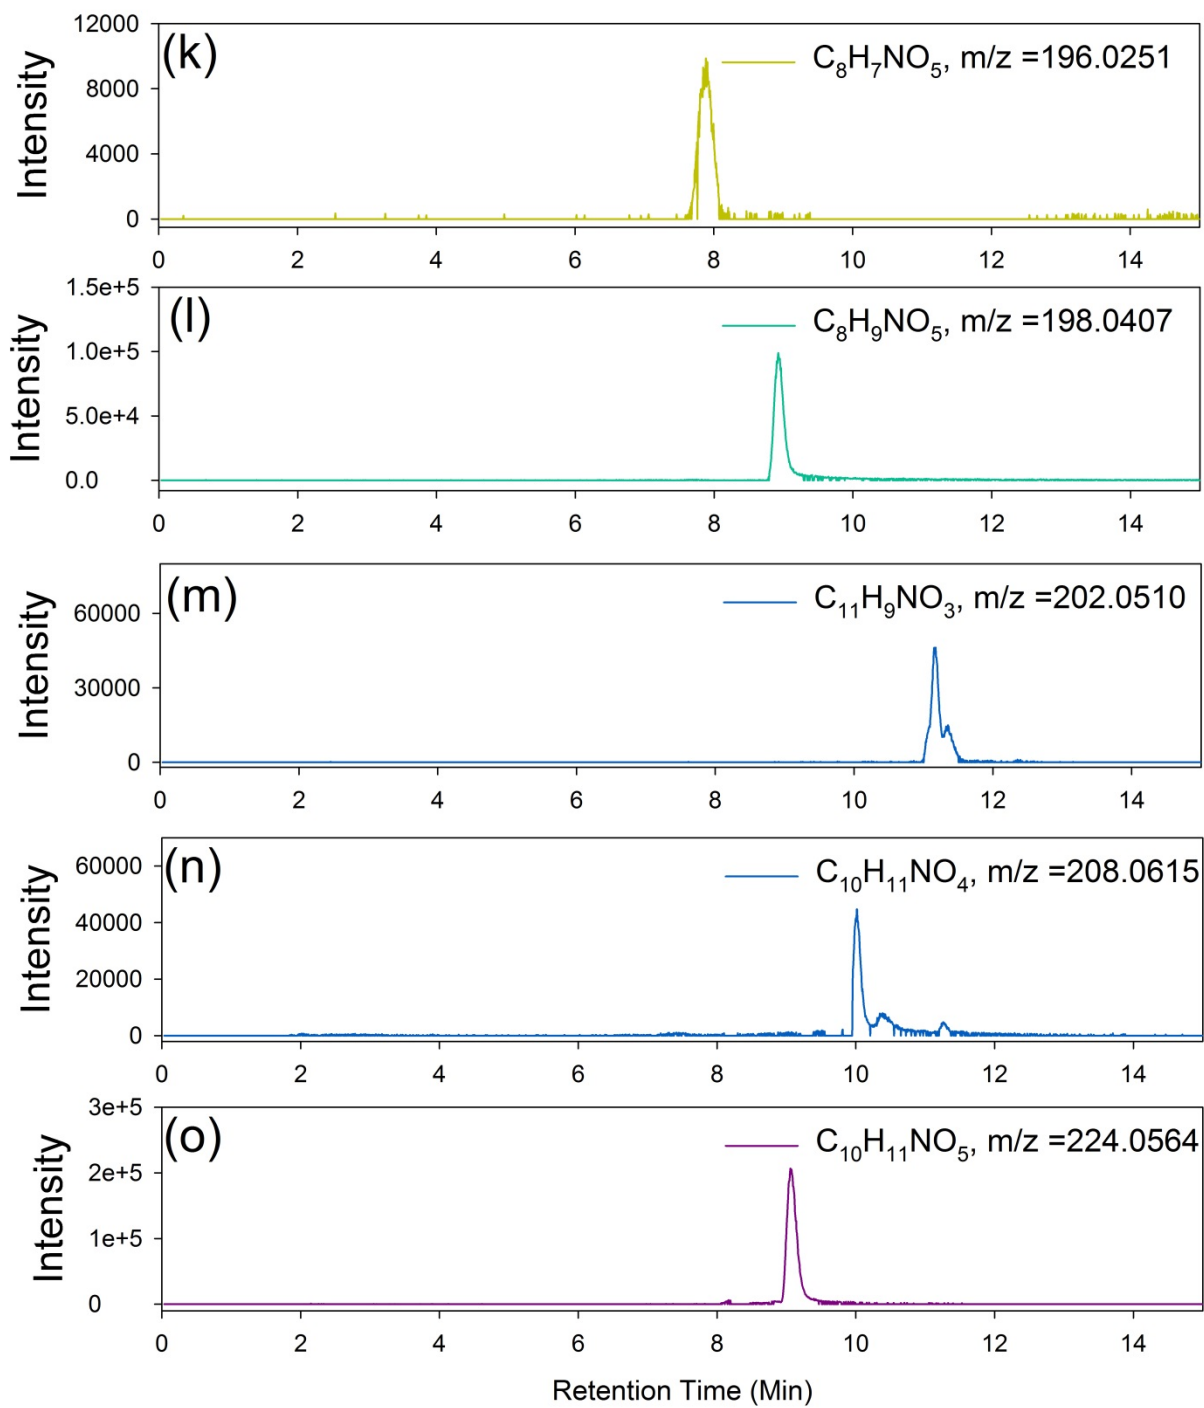

Figure S3. Continued.

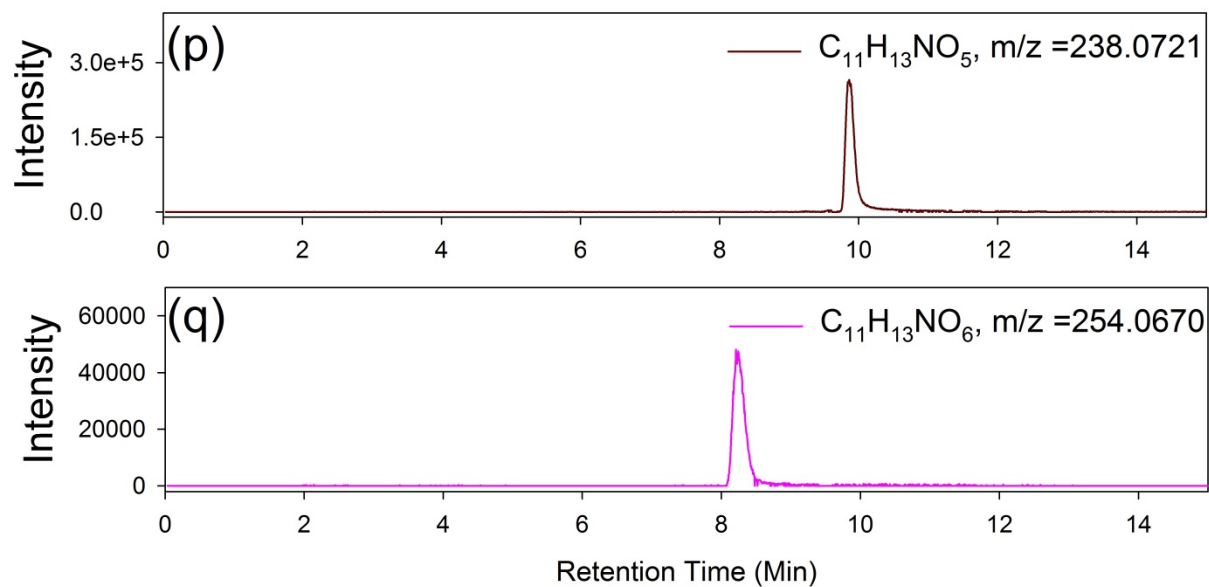

Figure S3. Continued.

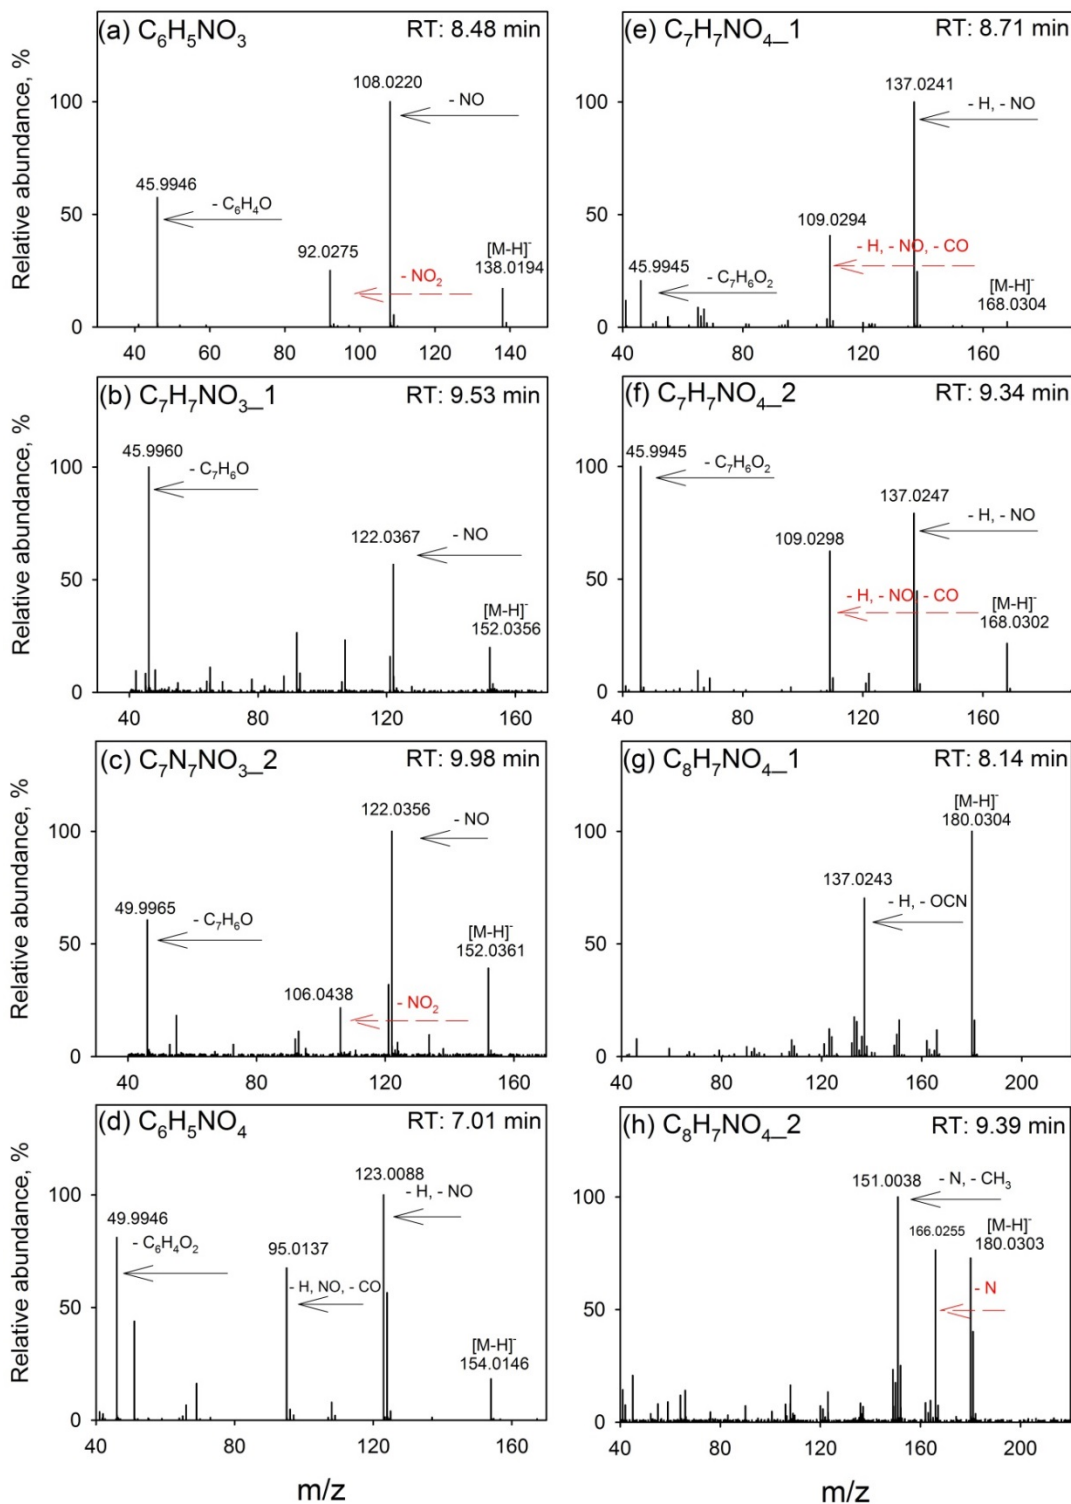

**Figure S4.** MS/MS spectra of (a)  $C_6H_5NO_3$ , (b, c)  $C_7H_7NO_3$  isomers, (d)  $C_6H_5NO_4$ , (e, f)  $C_7H_7NO_4$  isomers, (g, h)  $C_8H_7NO_4$  isomers, (i)  $C_8H_9NO_4$ , (j)  $C_8H_5NO_2$ , (k)  $C_7H_7NO_5$ , (l)  $C_{10}H_7NO_3$ , (m, n)  $C_9H_9NO_4$  isomers, (o)  $C_8H_7NO_5$ , (p)  $C_8H_9NO_5$ , (q)  $C_{11}H_9NO_3$ , (r)  $C_{10}H_{11}NO_4$ , (s)  $C_{10}H_{11}NO_5$ , (t)  $C_{11}H_{13}NO_5$  and (u)  $C_{11}H_{13}NO_6$  identified in emissions from solid fuel-cookstove combustions (Table S3).

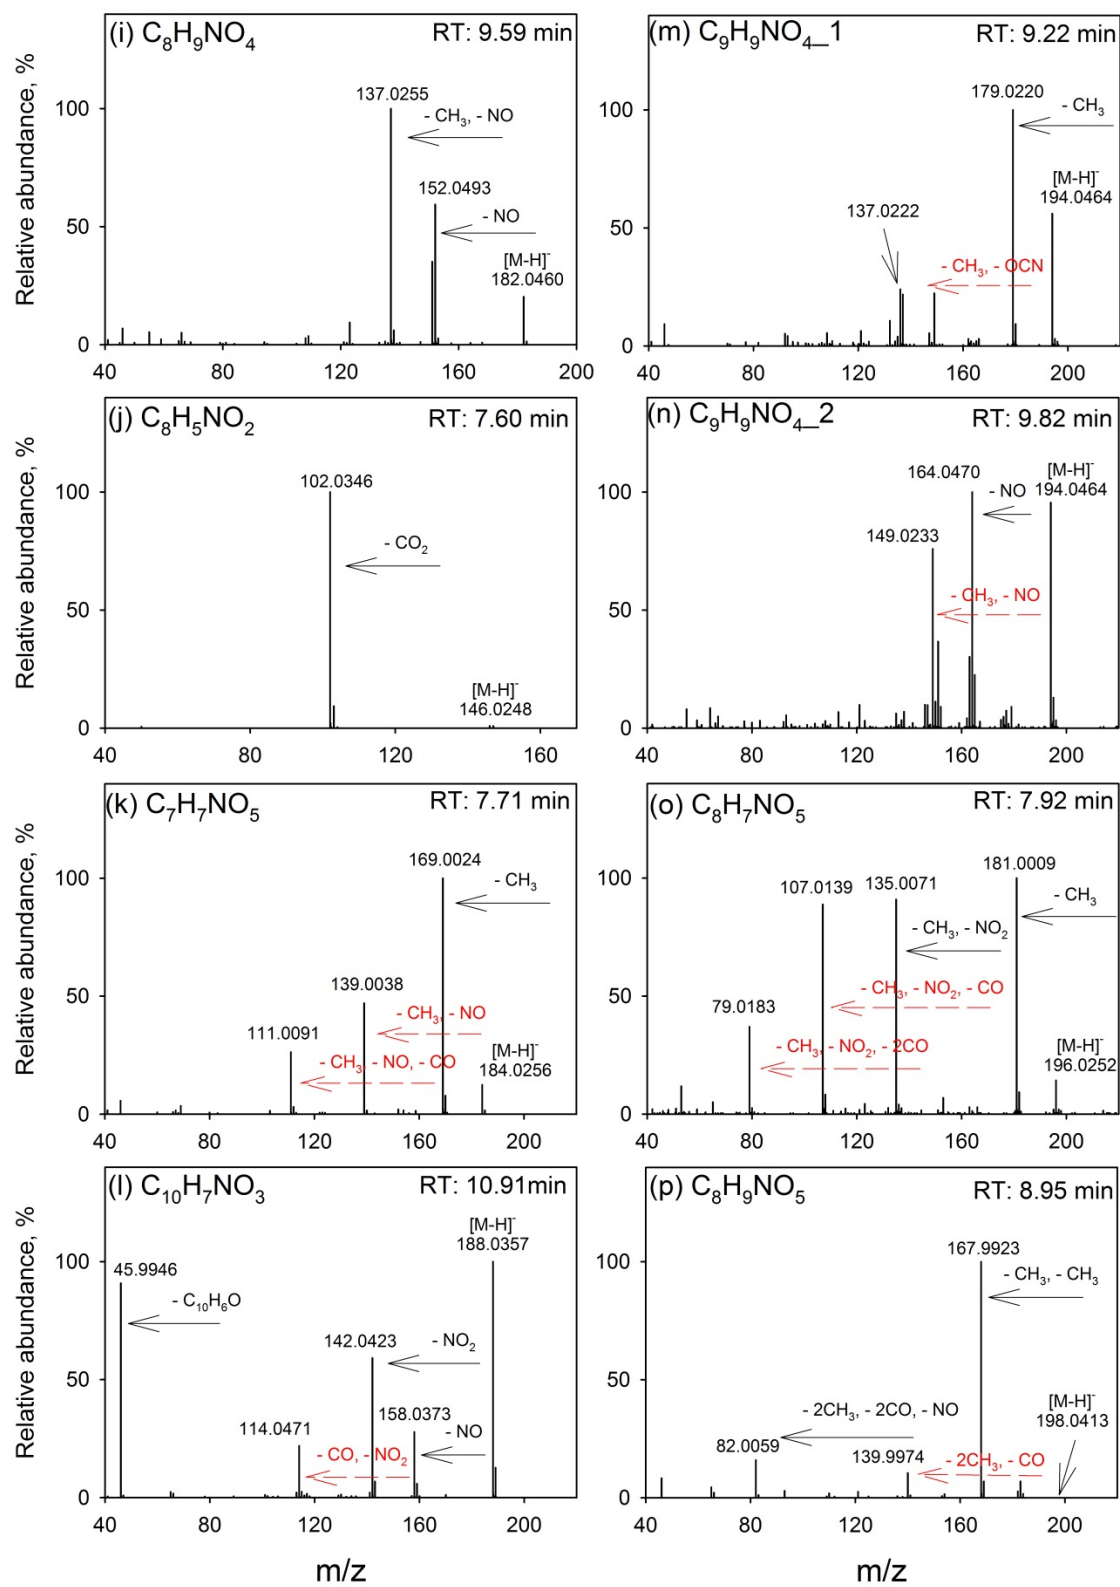

Figure S4. Continued

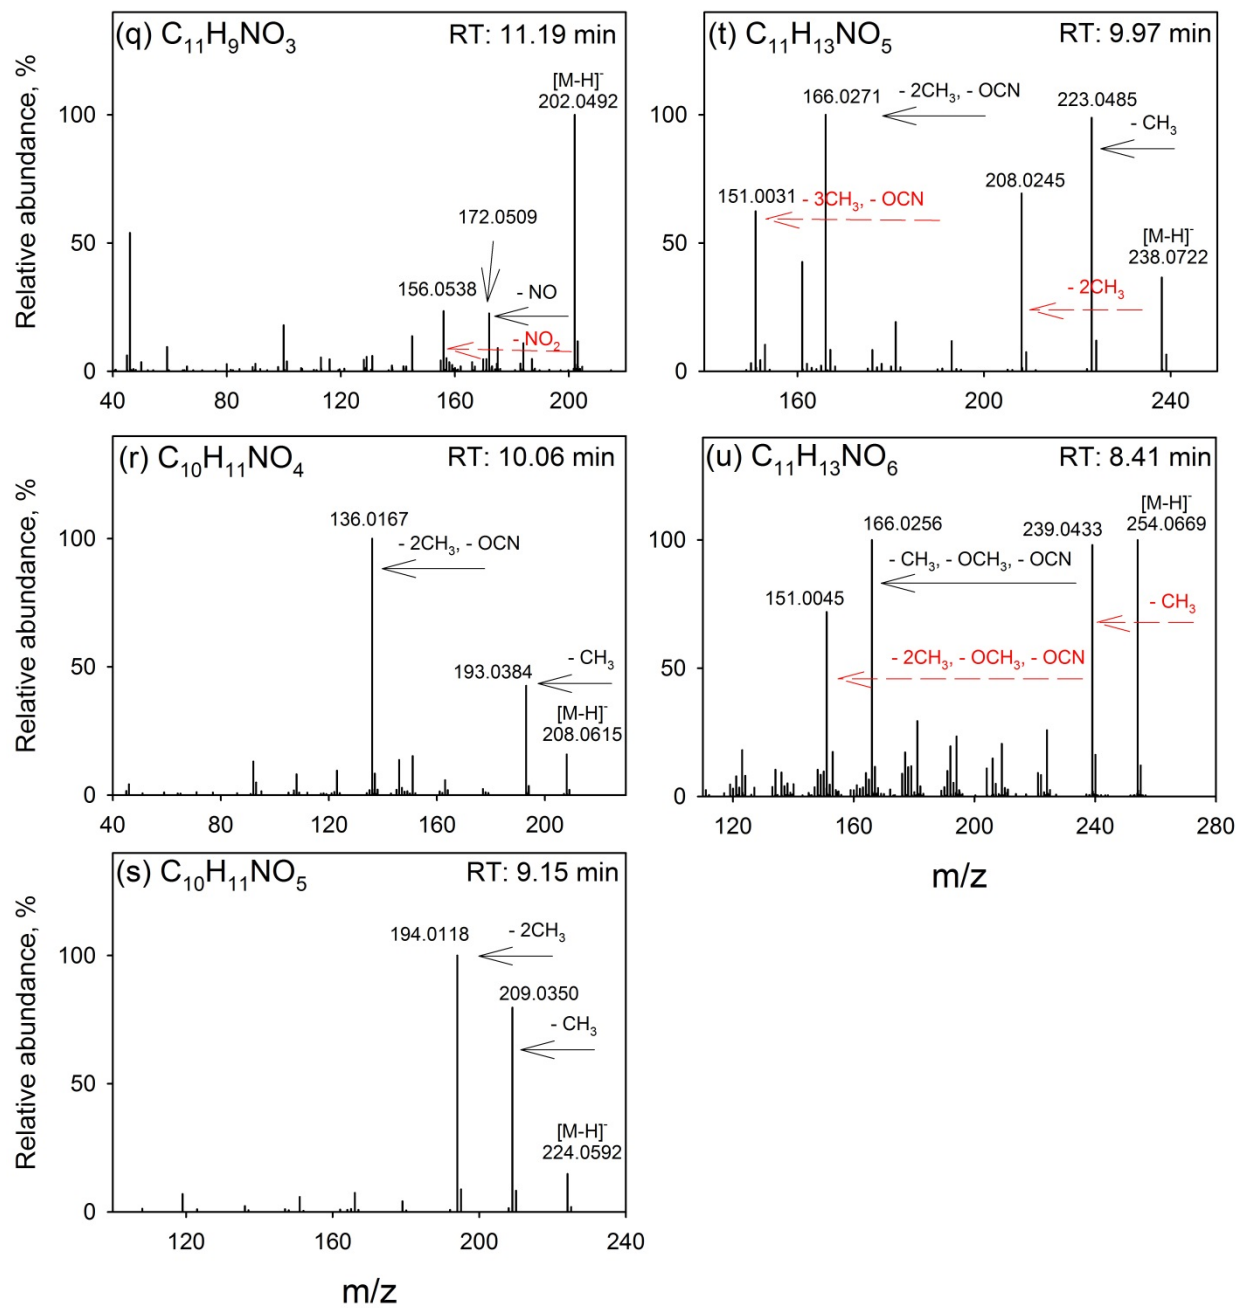

Figure S4. Continued

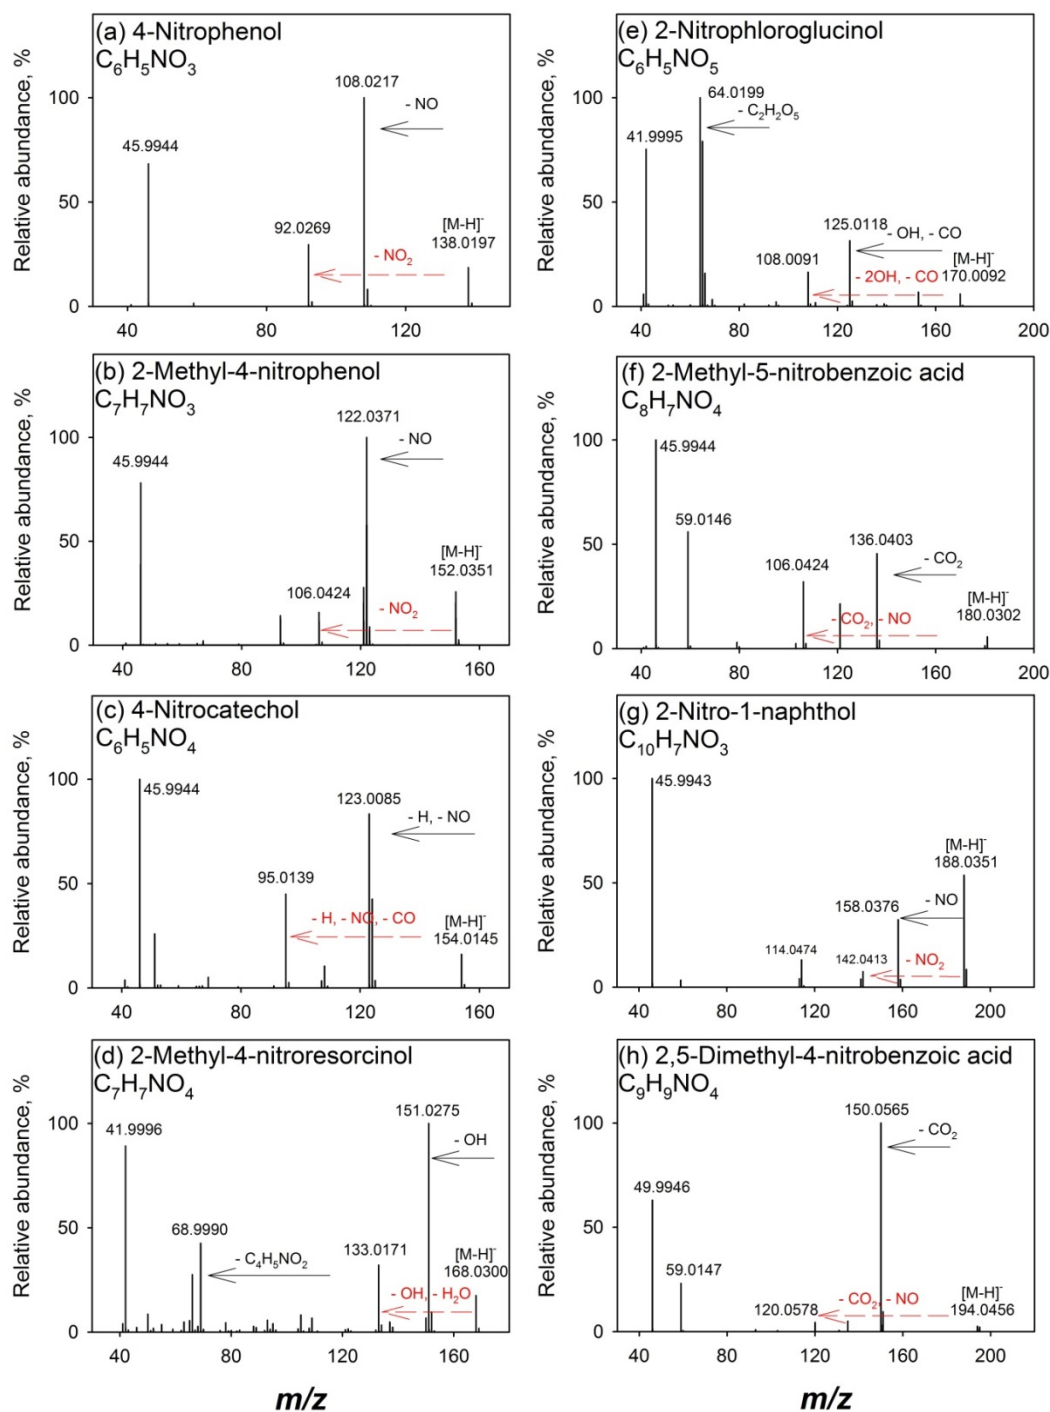

**Figure S5.** MS/MS spectra (ESI-) (a) 4-nitrophenol, (b) 2-methyl-4-nitrophenol, (c) 4-nitrocatechol, (d) 2-methyl-4-nitroresorcinol, (e) 2-nitrofloroglucinol, (f) 2-methyl-5-nitrobenzoic acid, (g) 2-nitro-1-naphthol and (h) 2,5-dimethyl-4-nitrobenzoic acid (Xie et al., 2017); mass spectra of (i) phenyl cyanate, (j) benzoxazole, (k) 4-methoxyphenyl isocyanate, and (l) 2,4-dimethoxyphenyl isocyanate with EI mode (Xie et al., 2019); MS/MS spectra (ESI+) of (e) 4-methoxyphenyl isocyanate and (f) 2,4-dimethoxyphenyl isocyanate with ESI positive ion mode (Xie et al., 2019); MS/MS spectra (ESI-) of (o) 4-cyanobenzoic acid.

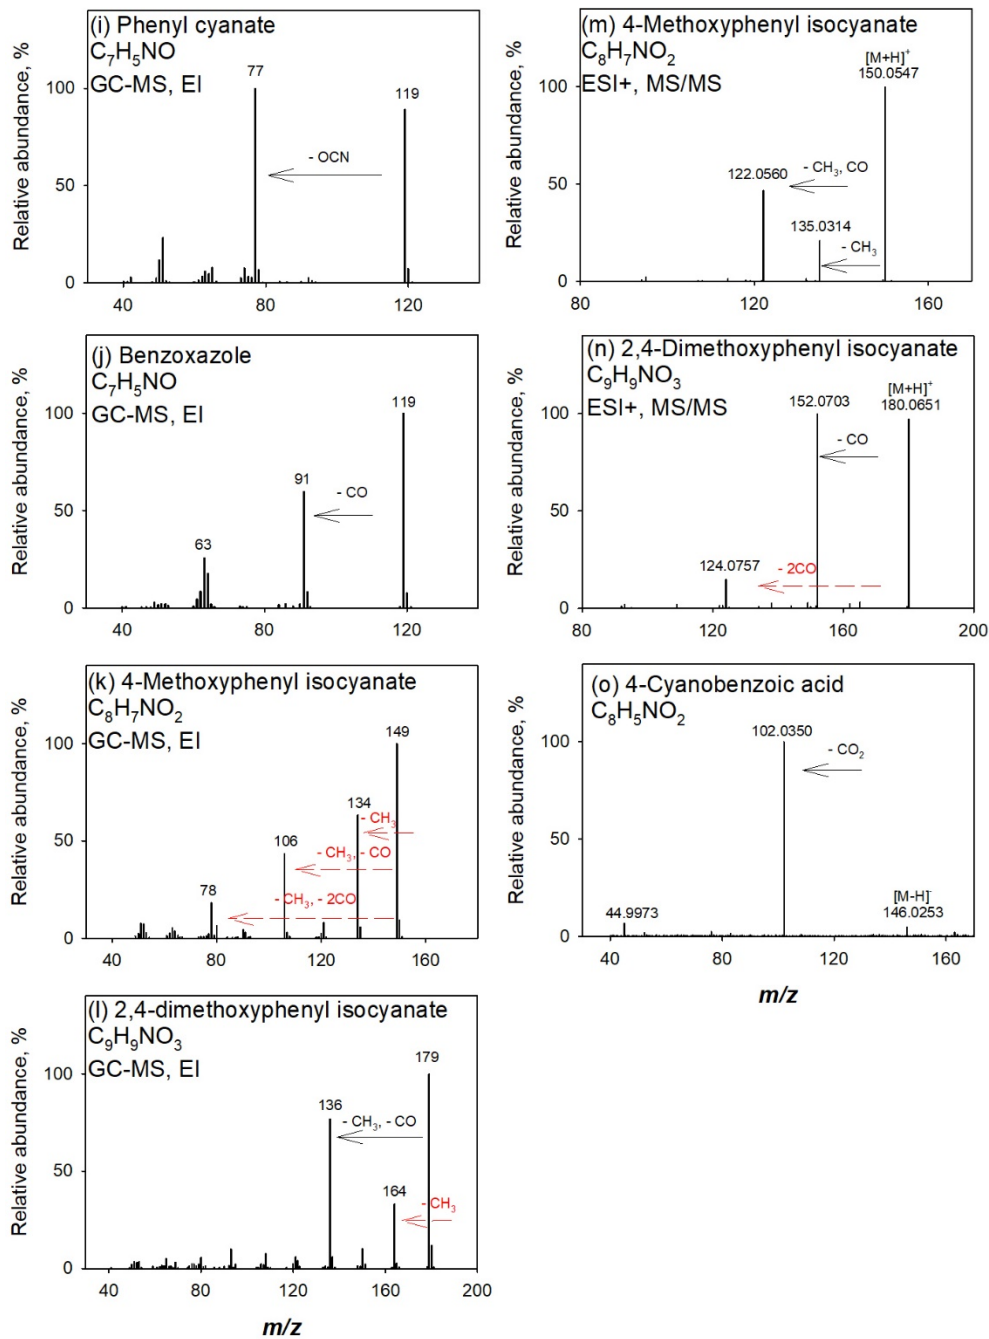

Figure S5. Continued

## References

- Chen, Y., and Bond, T. C.: Light absorption by organic carbon from wood combustion, *Atmospheric Chemistry and Physics*, 10, 1773-1787, 10.5194/acp-10-1773-2010, 2010.
- Hecobian, A., Zhang, X., Zheng, M., Frank, N., Edgerton, E. S., and Weber, R. J.: Water-soluble organic aerosol material and the light-absorption characteristics of aqueous extracts measured over the Southeastern United States, *Atmospheric Chemistry and Physics*, 10, 5965-5977, 10.5194/acp-10-5965-2010, 2010.
- Jetter, J., Zhao, Y., Smith, K. R., Khan, B., Yelverton, T., DeCarlo, P., and Hays, M. D.: Pollutant emissions and energy efficiency under controlled conditions for household biomass cookstoves and implications for metrics useful in setting international test standards, *Environmental Science & Technology*, 46, 10827-10834, 10.1021/es301693f, 2012.
- Jetter, J. J., and Kariher, P.: Solid-fuel household cook stoves: Characterization of performance and emissions, *Biomass and Bioenergy*, 33, 294-305, <http://dx.doi.org/10.1016/j.biombioe.2008.05.014>, 2009.
- Liu, J., Bergin, M., Guo, H., King, L., Kotra, N., Edgerton, E., and Weber, R. J.: Size-resolved measurements of brown carbon in water and methanol extracts and estimates of their contribution to ambient fine-particle light absorption, *Atmospheric Chemistry and Physics*, 13, 12389-12404, 10.5194/acp-13-12389-2013, 2013.
- MacCarty, N., Still, D., and Ogle, D.: Fuel use and emissions performance of fifty cooking stoves in the laboratory and related benchmarks of performance, *Energy for Sustainable Development*, 14, 161-171, <https://doi.org/10.1016/j.esd.2010.06.002>, 2010.
- NIOSH, 1999. National Institute of Occupational Safety and Health. Elemental carbon (diesel particulate): Method 5040, Rep. <https://www.cdc.gov/niosh/docs/2003-154/pdfs/5040f3.pdf> (1999). Accessed July, 2017.
- Shen, G., Preston, W., Ebersviller, S. M., Williams, C., Faircloth, J. W., Jetter, J. J., and Hays, M. D.: Polycyclic aromatic hydrocarbons in fine particulate matter emitted from burning kerosene, liquid petroleum gas, and wood fuels in household cookstoves, *Energy & Fuels*, 31, 3081-3090, 10.1021/acs.energyfuels.6b02641, 2017.
- Xie, M., Chen, X., Hays, M. D., Lewandowski, M., Offenber, J., Kleindienst, T. E., and Holder, A. L.: Light absorption of secondary organic aerosol: Composition and contribution of nitroaromatic compounds, *Environmental Science & Technology*, 51, 11607-11616, 10.1021/acs.est.7b03263, 2017.
- Xie, M., Shen, G., Holder, A. L., Hays, M. D., and Jetter, J. J.: Light absorption of organic carbon emitted from burning wood, charcoal, and kerosene in household cookstoves, *Environmental Pollution*, 240, 60-67, <https://doi.org/10.1016/j.envpol.2018.04.085>, 2018.
- Xie, M., Chen, X., Hays, M. D., and Holder, A. L.: Composition and light absorption of N-containing aromatic compounds in organic aerosols from laboratory biomass burning, *Atmospheric Chemistry and Physics*, 19, 2899-2915, 10.5194/acp-19-2899-2019, 2019.
